# Supplementary material for: Prognosis of acute exacerbation in idiopathic pulmonary fibrosis with pulmonary emphysema: a retrospective cohort study in Japan
Source: PubMed Central journal article supplement — BMJ Open. 2022 Sep 19;12(9):e062236. doi: 10.1136/bmjopen-2022-062236 (PMC9486357; doi:10.1136/bmjopen-2022-062236), 2022-09-19
Supplement: bmjopen-2022-062236.draft_revisions.pdf [file bmjopen-2022-062236.draft_revisions.pdf]

# BMJ Open

BMJ Open is committed to open peer review. As part of this commitment we make the peer review history of every article we publish publicly available.

When an article is published we post the peer reviewers' comments and the authors' responses online. We also post the versions of the paper that were used during peer review. These are the versions that the peer review comments apply to.

The versions of the paper that follow are the versions that were submitted during the peer review process. They are not the versions of record or the final published versions. They should not be cited or distributed as the published version of this manuscript.

BMJ Open is an open access journal and the full, final, typeset and author-corrected version of record of the manuscript is available on our site with no access controls, subscription charges or pay-per-view fees (<http://bmjopen.bmj.com>).

If you have any questions on BMJ Open's open peer review process please email [info.bmjopen@bmj.com](mailto:info.bmjopen@bmj.com)

# BMJ Open

## Prognosis of acute exacerbation in idiopathic pulmonary fibrosis with pulmonary emphysema

|                               |                                                                                                                                                                                                                                                                                                                                                                                                                                                                                                                                                                                                                                                                                                                                                                                                                                                                                                                                                                                                                                                                                                                                                                           |
|-------------------------------|---------------------------------------------------------------------------------------------------------------------------------------------------------------------------------------------------------------------------------------------------------------------------------------------------------------------------------------------------------------------------------------------------------------------------------------------------------------------------------------------------------------------------------------------------------------------------------------------------------------------------------------------------------------------------------------------------------------------------------------------------------------------------------------------------------------------------------------------------------------------------------------------------------------------------------------------------------------------------------------------------------------------------------------------------------------------------------------------------------------------------------------------------------------------------|
| Journal:                      | <i>BMJ Open</i>                                                                                                                                                                                                                                                                                                                                                                                                                                                                                                                                                                                                                                                                                                                                                                                                                                                                                                                                                                                                                                                                                                                                                           |
| Manuscript ID                 | bmjopen-2022-062236                                                                                                                                                                                                                                                                                                                                                                                                                                                                                                                                                                                                                                                                                                                                                                                                                                                                                                                                                                                                                                                                                                                                                       |
| Article Type:                 | Original research                                                                                                                                                                                                                                                                                                                                                                                                                                                                                                                                                                                                                                                                                                                                                                                                                                                                                                                                                                                                                                                                                                                                                         |
| Date Submitted by the Author: | 23-Feb-2022                                                                                                                                                                                                                                                                                                                                                                                                                                                                                                                                                                                                                                                                                                                                                                                                                                                                                                                                                                                                                                                                                                                                                               |
| Complete List of Authors:     | <p>Horio, Yukihiro; Tokai University School of Medicine Graduate School of Medicine<br/> Takahara, Takahisa; Tokai University School of Medicine Graduate School of Medicine<br/> Takahashi, Fuminari; Tokai University Oiso Hospital, Department of Medicine<br/> Enokida, Keito; Tokai University School of Medicine Graduate School of Medicine<br/> Nakamura, Noriko; Tokai University School of Medicine, Department of Radiology<br/> Tanaka, Jun; Tokai University School of Medicine Graduate School of Medicine<br/> Tomomatsu, Katsuyoshi; Tokai University School of Medicine Graduate School of Medicine<br/> Niimi, Kyoko; Tokai University School of Medicine Graduate School of Medicine<br/> Tajiri, Sakurako; Tokai University Oiso Hospital, Department of Medicine<br/> Hayama, Naoki; Tokai University School of Medicine Graduate School of Medicine<br/> Ito, Yoko; Tokai University School of Medicine Graduate School of Medicine<br/> Oguma, Tsuyoshi; Tokai University School of Medicine Graduate School of Medicine<br/> Asano, Koichiro; Tokai University School of Medicine Graduate School of Medicine, Division of Pulmonary Medicine</p> |
| Keywords:                     | Interstitial lung disease < THORACIC MEDICINE, Emphysema < THORACIC MEDICINE, Adult intensive & critical care < INTENSIVE & CRITICAL CARE                                                                                                                                                                                                                                                                                                                                                                                                                                                                                                                                                                                                                                                                                                                                                                                                                                                                                                                                                                                                                                 |
|                               |                                                                                                                                                                                                                                                                                                                                                                                                                                                                                                                                                                                                                                                                                                                                                                                                                                                                                                                                                                                                                                                                                                                                                                           |

SCHOLARONE™  
Manuscripts

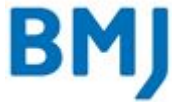

I, the Submitting Author has the right to grant and does grant on behalf of all authors of the Work (as defined in the below author licence), an exclusive licence and/or a non-exclusive licence for contributions from authors who are: i) UK Crown employees; ii) where BMJ has agreed a CC-BY licence shall apply, and/or iii) in accordance with the terms applicable for US Federal Government officers or employees acting as part of their official duties; on a worldwide, perpetual, irrevocable, royalty-free basis to BMJ Publishing Group Ltd ("BMJ") its licensees and where the relevant Journal is co-owned by BMJ to the co-owners of the Journal, to publish the Work in this journal and any other BMJ products and to exploit all rights, as set out in our [licence](#).

The Submitting Author accepts and understands that any supply made under these terms is made by BMJ to the Submitting Author unless you are acting as an employee on behalf of your employer or a postgraduate student of an affiliated institution which is paying any applicable article publishing charge ("APC") for Open Access articles. Where the Submitting Author wishes to make the Work available on an Open Access basis (and intends to pay the relevant APC), the terms of reuse of such Open Access shall be governed by a Creative Commons licence – details of these licences and which [Creative Commons](#) licence will apply to this Work are set out in our licence referred to above.

Other than as permitted in any relevant BMJ Author's Self Archiving Policies, I confirm this Work has not been accepted for publication elsewhere, is not being considered for publication elsewhere and does not duplicate material already published. I confirm all authors consent to publication of this Work and authorise the granting of this licence.

1  
2  
3  
4  
5  
6 1 **Prognosis of acute exacerbation in idiopathic pulmonary fibrosis**  
7  
8 2 **with pulmonary emphysema**  
9

10 3  
11  
12 4 Yukihiro Horio<sup>1</sup>, Takahisa Takihara<sup>1</sup>, Fuminari Takahashi<sup>3</sup>, Keito Enokida<sup>1</sup>, Noriko  
13  
14 5 Nakamura<sup>2</sup>, Jun Tanaka<sup>1</sup>, Katsuyoshi Tomomatsu<sup>1</sup>, Kyoko Niimi<sup>1</sup>, Sakurako Tajiri<sup>3</sup>, Naoki  
15  
16 6 Hayama<sup>1</sup>, Yoko Ito<sup>1</sup> Tsuyoshi Oguma<sup>1</sup>, and Koichiro Asano<sup>1</sup>  
17  
18 7

19  
20 8 <sup>1</sup>Division of Pulmonary Medicine, Department of Medicine, Kanagawa, Japan

21  
22 9 <sup>2</sup>Department of Radiology, Tokai University School of Medicine, Kanagawa, Japan,

23  
24 10 <sup>3</sup>Department of Medicine, Tokai University Oiso Hospital, Kanagawa, Japan  
25  
26 11

27  
28 12  
29  
30 13 **Corresponding author**

31  
32 14 Koichiro Asano, MD

33  
34 15 Division of Pulmonary Medicine, Department of Medicine

35  
36 16 Tokai University School of Medicine

37  
38 17 143 Shimokasuya, Isehara, Kanagawa 259-1193, Japan

39  
40 18 Phone: +81-463-93-1121

41  
42 19 Fax: +81-463-93-0381

43  
44 20 E-mail: ko-asano@tokai-u.jp  
45  
46 21

47  
48 22 Word count:

49  
50 23 Abstract: 199 words

51  
52 24 Manuscript: 3639 words  
53  
54 25  
55  
56  
57  
58  
59  
60

1  
2  
3  
4  
5  
6  
7  
8  
9  
10  
11  
12  
13  
14  
15  
16  
17  
18  
19  
20  
21  
22  
23  
24  
25  
26  
27  
28  
29  
30  
31  
32  
33  
34  
35  
36  
37  
38  
39  
40  
41  
42  
43  
44  
45  
46  
47  
48  
49  
50  
51  
52  
53  
54  
55  
56  
57  
58  
59  
60

26 **Abstract**

27 **Objectives:** To analyze the clinical characteristics and prognosis of acute exacerbation (AE)  
28 in patients with idiopathic pulmonary fibrosis (IPF) and pulmonary emphysema.

29 **Design:** A multicenter retrospective cohort study

30 **Setting:** Two university hospitals in Japan

31 **Participants:** Patients admitted to hospitals due to AE of IPF diagnosed based on a  
32 multidisciplinary discussion.

33 **Interventions:** None

34 **Primary and secondary outcome measures:** 90-day mortality rate

35 **Methods:** We retrospectively analyzed consecutive patients with AE of IPF, with or without  
36 pulmonary emphysema, admitted to two university hospitals between 2007 and 2018.

37 **Results:** Among 62 patients (median age, 75 years; 48 men) admitted for AE of IPF, 29  
38 patients (46%) presented with concomitant pulmonary emphysema. There was no significant  
39 difference in the arterial partial oxygen pressure/fraction of inhaled oxygen (P/F) ratio or other  
40 laboratory and radiographic data between patients with and without emphysema. The 90-day  
41 mortality rate was significantly lower in patients with emphysema than in those with IPF alone  
42 (23% vs. 52%,  $p = 0.03$ ). The median survival time was significantly longer in patients with  
43 emphysema than in those with IPF alone (405 vs. 242 days,  $p = 0.02$ ).

44 **Conclusion:** Patients with IPF and emphysema had better short-term survival after AE than  
45 those with non-emphysematous IPF.

1  
2  
3  
4  
5  
6  
7  
8  
9  
10  
11  
12  
13  
14  
15  
16  
17  
18  
19  
20  
21  
22  
23  
24  
25  
26  
27  
28  
29  
30  
31  
32  
33  
34  
35  
36  
37  
38  
39  
40  
41  
42  
43  
44  
45  
46  
47  
48  
49  
50  
51  
52

## 46 **Strengths and limitations of this study**

- 47 ● We explored the prognosis of patients with combined pulmonary fibrosis and  
48 emphysema who developed acute exacerbations.
  - 49 ● The studied population was diagnosed based on a multidisciplinary discussion.
  - 50 ● We could not estimate the incidence of acute exacerbation among patients with  
51 idiopathic pulmonary fibrosis and emphysema because of the retrospective design of  
52 this study.
- For peer review only

## 53 **Background**

54 Idiopathic pulmonary fibrosis (IPF) is characterized by chronic, progressive, fibrosing  
55 interstitial pneumonia of unknown etiology. The prognosis of IPF is poor, with a median  
56 survival time of 2–3 years. Acute exacerbation (AE) is the major cause of death in IPF  
57 patients, accounting for up to 40% of all deaths.[1] AE-IPF is defined as the worsening of  
58 respiratory failure with acute or subacute onset that cannot be explained by cardiac failure  
59 or fluid overload, which parallels the Berlin criteria for acute respiratory distress syndrome.[2]

60 Pulmonary emphysema is common in lungs with IPF, as the estimated prevalence of  
61 emphysema ranges between 25% and 50%.[3] Cottin et al. proposed the term combined  
62 pulmonary fibrosis and emphysema (CPFE), which comprises upper lobe-dominant  
63 emphysema and lower lobe-dominant fibrosis.[4] CPFE exhibits clinical characteristics, such  
64 as high prevalence in heavy smokers, relatively normal lung volumes accompanied by  
65 severely impaired gas exchange capacity, and a high risk for lung cancer and pulmonary  
66 arterial hypertension.[3-5] Data on the prognosis of IPF with emphysema are inconsistent  
67 among reports although recent studies have reported that the prognosis of CPFE is as poor  
68 as that of IPF alone.[6]

69 The incidence of AEs in patients with CPFE has been reported to be 9.4% per year [7],  
70 which is compatible with the annual rate of AEs in patients with IPF.[8] In contrast, AEs  
71 accounted for 31% of deaths in patients with IPF, but accounted for only 11.8% of deaths in  
72 patients with CPFE.[9] Other causes, such as lung cancer and pulmonary artery hypertension,  
73 may play a major role in the mortality of patients with IPF and emphysema.[3,4] Another  
74 possible explanation is that the prognosis of AE is better in patients with combined fibrosis  
75 and emphysema than in patients with IPF alone. Therefore, we analyzed the clinical  
76 characteristics and prognoses of patients with AE of IPF and pulmonary emphysema.

77

78

## 79 **Methods**

## 80 *Patients*

81 Consecutive patients admitted to two university hospitals for AE-IPF between January 2007  
82 and August 2018 were retrospectively analyzed. IPF was diagnosed based on a  
83 multidisciplinary discussion (MDD) by two pulmonologists and a radiologist using the  
84 patients' clinical history, physical examination, laboratory test results, and radiographic data  
85 from high-resolution computed tomography (HRCT).

86 AE-IPF was diagnosed based on the following criteria:[2] 1) previous or concurrent diagnosis  
87 of IPF; (2) acute worsening or development of dyspnea typically of duration <1 month; 3)  
88 computed tomography with new bilateral ground-glass opacity and/or consolidation  
89 superimposed on a background pattern consistent with the usual interstitial pneumonia  
90 pattern; and 4) deterioration not fully explained by cardiac failure or fluid overload. The  
91 patients with neoplasms undergoing active treatment, including radiation therapy,  
92 chemotherapy with cytotoxic or molecular-targeted drugs, or immunotherapy with immune  
93 checkpoint inhibitors, at the onset of AE were excluded.

94 AE-IPF was treated with an appropriate administration of oxygen and pharmacotherapy using  
95 prednisone (0.5–1 mg/kg per day) with or without preceding methylprednisolone pulse  
96 therapy (1 g/day for 3 days). The prednisone dose was tapered based on the response to  
97 therapy. In refractory cases, immunosuppressive therapy with intravenous  
98 cyclophosphamide (500 mg every 2–4 weeks) may have been added.

99 This study was approved by the Institutional Review Board of Tokai University Hospital (17R-  
100 198) and Tokai University Oiso Hospital (18R-241), and was conducted in compliance with  
101 the principles of the Declaration of Helsinki. Informed consent was obtained from the Tokai  
102 University Hospital website as an opt-out. Patients who rejected were excluded.

103

## 104 *Clinical and laboratory parameters*

105 The clinical and laboratory data within 12 months prior to and at the onset of AE were  
106 collected from medical charts. Spirometry was performed during stable disease using a



1  
2  
3  
4  
5 107 Super Spiro DISCOM-21FX III spirometer (CHEST Corp., Tokyo, Japan) by trained clinical  
6  
7 108 technicians. The predicted values of forced vital capacity (FVC) and forced expiratory volume  
8  
9 109 in 1 s (FEV<sub>1</sub>) were calculated using a previously reported equation.[10] In patients without  
10  
11 110 arterial blood gas data at the time of admission, the partial pressure of arterial oxygen (PaO<sub>2</sub>)  
12  
13 111 was calculated based on percutaneous arterial oxygen saturation (SpO<sub>2</sub>) using the Hill  
14  
15 112 formula.[11] The serum levels of Krebs von Lungen-6 (KL-6) were measured using an  
16  
17 113 electrochemi-luminescence immunoassay and Lumipulse G1200 Analyzer (Rebio, Fuji,  
18  
19 114 Japan). The surfactant protein D (SP-D) levels were measured using commercially available  
20  
21 115 enzyme-linked immunosorbent assay kits (RayBiotech, Norcross, GA, USA).  
22

23  
24 116

#### 25 117 *Radiographic evaluation of thoracic CT and diagnosis IPF*

26  
27 118 Thoracic CT with 1.5-mm-thick axial sections was obtained at 1-cm intervals throughout the  
28  
29 119 entire thorax in the inspiratory phase. Emphysema was defined as demarcated areas of  
30  
31 120 decreased attenuation compared to contiguous normal lung tissue and marginated by a very  
32  
33 121 thin or no wall, with upper-zone predominance. The existence of emphysema and diagnostic  
34  
35 122 categories of usual interstitial pneumonia (UIP) based on CT patterns [12,13] were diagnosed  
36  
37 123 based on a discussion between two pulmonologists and a radiologist.  
38

39  
40 124

#### 41 125 *Statistical analysis*

42  
43 126 The data are expressed as mean ± standard deviation or median and interquartile range for  
44  
45 127 continuous variables, and number and percentage for categorical data. Group comparisons  
46  
47 128 were made using the Mann–Whitney U test for continuous variables and Fisher’s exact test  
48  
49 129 for categorical variables. Kaplan–Meier survival curves and log-rank tests were used to  
50  
51 130 evaluate the survival. Cox proportional hazards regression analysis of mortality within 90  
52  
53 131 days was performed using age, sex, and other factors with  $p < 0.1$  in univariate analysis and  
54  
55 132 data available in > 90% of the cases. A statistical analysis was performed using IBM SPSS  
56  
57  
58  
59  
60

1  
2  
3  
4  
5 133 Statistics software ver. 21 (IBM, Chicago, IL, USA). The level of statistical significance was  
6  
7 134 set at  $p < 0.05$ .

8  
9 135

10  
11 136 *Patient and public involvement*

12  
13 137 This was a retrospective cohort study with no direct patient and public engagement.  
14  
15  
16 138

17  
18 139 **Results**

19  
20 140 *Clinical characteristics prior to AE*

21  
22 141 We identified 62 patients (median age, 75 years; 48 men and 14 women) admitted to  
23  
24 142 hospitals due to AE-IPF during the study period. Notably, 29 patients (46.7%) had  
25  
26 143 emphysema (IPF with emphysema group) and 33 patients had IPF without emphysema (IPF  
27  
28 144 alone group).

29  
30 145 The clinical characteristics at baseline (within 12 months before AE) are presented in Table  
31  
32 146 1. All the patients with emphysema were smokers, whereas 19 patients (58%) with IPF alone  
33  
34 147 were never smokers. The total exposure to cigarette smoke (pack-years) was greater in the  
35  
36 148 IPF with emphysema group than in the IPF alone group ( $p < 0.001$ ). Age, sex, and proportion  
37  
38 149 of patients with lung cancer, under long-term oxygen therapy, or on pharmacotherapy with  
39  
40 150 prednisolone or antifibrotic agents were not significantly different between the groups. The  
41  
42 151 data of pulmonary function tests within one year prior to AE were available in 20 cases in the  
43  
44 152 IPF with emphysema group and 17 cases in the IPF alone group. The FVC, %FVC of the  
45  
46 153 predicted value, and FEV<sub>1</sub> were significantly higher in the IPF with emphysema group ( $p =$   
47  
48 154 0.045, 0.002, and 0.001, respectively), whereas the FEV<sub>1</sub>/FVC was not significantly different  
49  
50 155 between the groups. The diagnostic categories of UIP based on CT patterns were not  
51  
52 156 significantly different between the groups. One case, which was categorized as an alternative  
53  
54 157 pattern, was diagnosed as IPF upon autopsy.  
55  
56  
57  
58  
59  
60

158 **Table 1. Baseline characteristics in patients with idiopathic pulmonary fibrosis with**  
 159 **or without concomitant pulmonary emphysema**

| Characteristic                              | IPF with emphysema<br>(n=29) | IPF alone<br>(n=33) | P value |
|---------------------------------------------|------------------------------|---------------------|---------|
| Age, years                                  | 74±6                         | 76 ± 8              | 0.20    |
| Male, n (%)                                 | 28 (97%)                     | 20 (60%)            |         |
| Smoking status                              |                              |                     |         |
| Smokers, n (%)                              | 29 (100%)                    | 14 (42%)            | <0.001  |
| Pack-years                                  | 59±68                        | 12 ± 20             | <0.001  |
| Lung cancer, n (%)                          | 2 (7%)                       | 1 (3%)              | 0.59    |
| KL-6 in serum (U/mL)                        | 1266±697 (n=24)              | 1255 ± 817 (n=26)   | 0.741   |
| Pulmonary functions                         | n=20                         | n=17                |         |
| FVC (L)                                     | 2.26±0.68                    | 1.54 ± 0.61         | 0.045   |
| FVC, %predicted                             | 69.4±20.3                    | 56.8 ± 22.4         | 0.002   |
| FEV <sub>1</sub> (L)                        | 1.9±0.5                      | 1.3±0.4             | 0.001   |
| FEV <sub>1</sub> /FVC (%)                   | 85.9±7.6                     | 89.3 ± 9.2          | 0.110   |
| Thoracic computed tomography                |                              |                     |         |
| CT pattern (2018 IPF guideline)             |                              |                     |         |
| Definite/Probable/Indeterminate/Alternative | 21/7/0/1                     | 14/19/0/0           | 0.08    |
| Treatment, n (%)                            |                              |                     |         |
| Prednisolone                                | 7 (24%)                      | 8 (24%)             | 0.99    |
| Antifibrotic agents                         | 6 (20%)                      | 3 (9%)              | 0.13    |

160 IPF, interstitial pulmonary fibrosis; FVC, forced vital capacity; FEV<sub>1</sub>, forced expiratory volume in one  
 161 second; KL-6, Krebs von Lungen-6

162

163

164 *Clinical characteristics upon admission due to AE*

165 The laboratory data upon admission, such as leukocyte counts in peripheral blood and serum  
 166 levels of lactate dehydrogenase, were not significantly different between the IPF with  
 167 emphysema and IPF alone groups (Table 2). In addition, the fraction of inhaled oxygen (FIO<sub>2</sub>)  
 168 and the PaO<sub>2</sub>/FIO<sub>2</sub> (P/F) ratio were not significantly different between the groups. The serum  
 169 KL-6 and SP-D levels were higher in the IPF with emphysema group ( $p = 0.05$  and  $0.025$ ,  
 170 respectively).

171 **Table 2. Clinical characteristics on admission due to acute exacerbation**

|                                   | IPF with emphysema<br>(n=29) | IPF alone<br>(n=33) | P value |
|-----------------------------------|------------------------------|---------------------|---------|
| Respiratory rate (/min)           | 23±5                         | 25±6                | 0.18    |
| Laboratory data                   |                              |                     |         |
| Leukocytes (×10 <sup>3</sup> /μL) | 10.1±3.1                     | 11.0±5.1            | 0.27    |
| Lactate dehydrogenase (U/L)       | 377±164                      | 372±103             | 0.60    |
| KL-6 (U/mL)                       | 2109±1249                    | 1644±1193           | 0.049   |
| SP-D (U/mL) (n=46)                | 599±380 (n=24)               | 388±305 (n=22)      | 0.025   |
| BNP (pg/mL) (n=47)                | 116±149 (n=24)               | 166±194 (n=23)      | 0.25    |
| FIO <sub>2</sub>                  | 0.38±0.24                    | 0.33±0.20           | 0.94    |
| P/F ratio                         | 233±105                      | 221±80              | 0.51    |
| Treatment, n (%)                  |                              |                     |         |
| Drug                              |                              |                     |         |
| High dose corticosteroids         | 29 (100%)                    | 32 (97%)            | -       |
| Methylprednisolone pulse therapy  | 17 (58%)                     | 22 (66%)            | 0.51    |
| Immunosuppressive therapy         | 3 (10%)                      | 4 (12%)             | 0.45    |
| Oxygen therapy                    |                              |                     |         |
| High flow nasal cannula           | 4 (13%)                      | 8 (24%)             | 0.29    |
| NIPPV                             | 0 (0%)                       | 2 (6%)              | 0.49    |
| IPPV                              | 0 (0%)                       | 2 (6%)              | 0.49    |

172 AE, acute exacerbation; IPF, interstitial pulmonary fibrosis; KL-6, Krebs von Lungen-6;  
 173 SP-D, surfactant protein D; P/F ratio, PaO<sub>2</sub>/FIO<sub>2</sub> ratio; SIRS, systemic inflammatory response syndrome;  
 174 NIPPV, non-invasive intermittent positive pressure ventilation; IPPV, intermittent positive pressure  
 175 ventilation.

176  
 177 All the patients, except for one patient who was not treated with prednisolone, were treated  
 178 with high-dose prednisolone and oxygen therapy. There was no difference in the proportion  
 179 of patients treated with methylprednisolone pulse therapy and/or immunosuppressive  
 180 therapy between the groups. Four patients with IPF and emphysema and 12 patients with  
 181 IPF alone required a high-flow nasal cannula or positive-pressure ventilation for the treatment  
 182 of respiratory failure.

#### 184 *Short-term prognosis within 90 days after admission*

185 Nine (15%), 15 (24%), and 23 (38%) patients died within 7, 30, and 90 days of admission  
 186 due to AE-IPF, respectively. The survivors were more likely to have emphysema (56%) than  
 187 the deceased (30%), with an odds ratio of 0.27 (95% CI, 0.07–0.88; *p* = 0.02). FVC and P/F

188 ratio were lower ( $p = 0.02$  and  $0.06$ , respectively) in the deceased patients (Table 3). The  
 189 survival rate was significantly higher in patients with emphysema than in those without  
 190 emphysema ( $p = 0.03$ ), and the 90-days survival rate was higher in patients with emphysema  
 191 (76% and 50%, respectively; Figure 1). The age, sex, smoking history (pack-years), serum  
 192 KL-6 levels, comorbidity of lung cancer, long-term oxygen therapy, and the proportion of  
 193 patients using prednisolone and/or antifibrotic agents before AE were not significantly  
 194 different between patients who died and those who survived for the first 90 days (Table 3). A  
 195 Cox proportional hazards regression analysis revealed that the presence of emphysema  
 196 (hazard ratio 0.33 [95%CI 0.14–0.82],  $p = 0.01$ ) and P/F ratio (hazard ratio 0.99 [95%CI 0.98–  
 197 0.99],  $p = 0.01$ ) were predictors of mortality within 90 days after adjustment for age and sex  
 198 (Table 4).

200 **Table 3. Clinical characteristics of non-survivors and survivors at day 90**

|                                             | Non-survivors<br>at day 90<br>(n=23) | Survivors<br>at day 90<br>(n=36) | P value |
|---------------------------------------------|--------------------------------------|----------------------------------|---------|
| <b>Baseline clinical characteristics</b>    |                                      |                                  |         |
| Age, years                                  | 77±6                                 | 73±7                             | 0.25    |
| male, n (%)                                 | 17 (74%)                             | 32 (89%)                         | 0.18    |
| Smoking status                              |                                      |                                  |         |
| Smokers, n (%)                              | 12 (52%)                             | 26 (72%)                         | 0.11    |
| Pack-years                                  | 22±27                                | 42.3±33.1                        | 0.13    |
| Pulmonary functions                         | n=13                                 | n=23                             |         |
| FVC (L)                                     | 1.56±0.72                            | 2.23±0.67                        | 0.02    |
| FVC, %predicted                             | 56.4±27.3                            | 70.6±17.1                        | 0.12    |
| FEV <sub>1</sub> /FVC (%)                   | 89.5±9.5                             | 86.3±7.6                         | 0.24    |
| Thoracic computed tomography                |                                      |                                  |         |
| Emphysema, n (%)                            | 7 (30%)                              | 20 (56%)                         | 0.02    |
| CT pattern (2018 IPF guideline)             |                                      |                                  |         |
| Definite/Probable/Indeterminate/Alternative | 13/10/0/0                            | 22/13/0/1                        | 0.35    |
| Treatment, n (%)                            |                                      |                                  |         |
| Long-term oxygen therapy                    | 5 (21%)                              | 7 (19%)                          | 0.83    |
| Prednisolone                                | 6 (26%)                              | 8 (22%)                          | 0.73    |
| Antifibrotic agents                         | 2 (7%)                               | 6 (16%)                          | 0.22    |
| <b>Clinical data on admission</b>           |                                      |                                  |         |
| Respiratory rate (/min)                     | 26±5                                 | 23±6                             | 0.18    |
| Laboratory data                             |                                      |                                  |         |
| Leukocytes (×10 <sup>3</sup> /μL)           | 11.2±3.5                             | 11.0±5.1                         | 0.34    |

|                                  |                   |                   |      |
|----------------------------------|-------------------|-------------------|------|
| Lactate dehydrogenase (U/L)      | 380±106           | 372±103           | 0.42 |
| KL-6 (U/mL)                      | 1926±1642         | 1644±1193         | 0.63 |
| SP-D (U/mL)                      | 352±147<br>(n=15) | 388±305<br>(n=22) | 0.23 |
| FIO <sub>2</sub>                 | 0.40±0.29         | 0.34±0.20         | 0.3  |
| P/F ratio                        | 194±94            | 241±90            | 0.06 |
| Treatments, n (%)                |                   |                   |      |
| Drugs                            |                   |                   |      |
| Methylprednisolone pulse therapy | 17 (74%)          | 22 (61%)          | 0.60 |
| Immunosuppressive therapy        | 3 (13%)           | 4 (11%)           | 0.14 |
| Oxygen therapy                   |                   |                   |      |
| High flow nasal cannula          | 7 (30%)           | 5 (14%)           | 0.11 |
| NPPV                             | 2 (9%)            | 0 (0%)            | 0.16 |
| IPPV                             | 1 (4%)            | 1 (3%)            | 1.00 |

201 FEV<sub>1</sub>, forced expiratory volume in one second; FVC, forced vital capacity; IPPV, intermittent positive  
 202 pressure ventilation; KL-6, Krebs von Lungen-6; NIPPV, non-invasive intermittent positive pressure  
 203 ventilation; P/F ratio, PaO<sub>2</sub>/FIO<sub>2</sub> ratio; SIRS, systemic inflammatory response syndrome; SP-D, surfactant  
 204 protein D.

205

206

207 **Table 4. Cox proportional hazards regression analysis of mortality within 90 days**

|                                          | Hazard ratio | 95% confidence interval | P value |
|------------------------------------------|--------------|-------------------------|---------|
| Pulmonary emphysema                      | 0.33         | 0.14-0.82               | 0.01    |
| PaO <sub>2</sub> /FIO <sub>2</sub> ratio | 0.99         | 0.98-0.99               | 0.01    |

208 Adjusted for age and sex

209

210

211 In the multivariate analysis, FVC was not included because of the high rate of missing values.

212 Therefore, we performed a sub-analysis by dividing the patients into four subgroups

213 according to the presence or absence of emphysema and baseline FVC (≥60% or <60% of

214 the predicted value). A Kaplan–Meier estimate according to this subgrouping revealed that

215 the presence of emphysema tended to have a good prognosis regardless of the %FVC

216 (Supplemental Figure 1). A Cox proportional hazards regression analysis including

217 the %FVC revealed that the presence of emphysema remained a predictor of mortality within  
218 90 days (hazard ratio, 0.30 [95%CI 0.09–0.98],  $p = 0.04$ ). (Supplemental Table 1)

219

### 220 *Long-term prognosis*

221 Notably, 49 patients, including 21 patients in the IPF with emphysema group and 28 patients  
222 in the IPF alone group, died during the observation period (median: 325 days, range: 2–1721  
223 days). Although there was no difference in the total mortality between the groups, the median  
224 survival time was significantly longer in the IPF with emphysema group than in the IPF alone  
225 group (405 days vs. 254 days,  $p = 0.02$ , Table 5).

226

227 **Table 5. Prognosis after acute exacerbation of IPF**

|                                    | IPF with emphysema | IPF alone      | P value |
|------------------------------------|--------------------|----------------|---------|
| All patients                       | n = 29             | n = 33         |         |
| Median survival time, days         | 405 (2-1544)       | 254 (2-1721)   | 0.02    |
| Survivors at day 90                | n = 22             | n = 16         |         |
| Median survival time, days         | 573 (110-1544)     | 565 (106-1721) | 0.96    |
| Cause of death                     |                    |                |         |
| Acute exacerbation, n (%)          | 4 (20%)            | 6 (38%)        | 0.14    |
| Chronic respiratory failure, n (%) | 3 (14%)            | 4 (25%)        | 0.81    |
| Pneumonia, n (%)                   | 3 (14%)            | 0 (0%)         | 0.51    |
| Unknown, n (%)                     | 4 (20%)            | 1 (6%)         | -       |

228 IPF, idiopathic pulmonary fibrosis

229

230 There were 38 patients who survived 90 days or more after admission due to AE-IPF,  
231 including 22 patients with emphysema and 16 patients without emphysema (Table 5). In  
232 these acute phase survivors, the long-term prognosis was not significantly different between  
233 patients with and without emphysema ( $p = 0.8$ ) (Supplemental Figure 2). The median survival  
234 times for the IPF with emphysema and IPF alone groups were 573 and 565 days, respectively  
235 ( $p = 0.96$ ). The leading cause of death in survivors was the exacerbation of IPF, regardless  
236 of the presence of emphysema (Table 5).

237

238 **Discussion**

239 We retrospectively analyzed 62 consecutive patients admitted for AE-IPF in two hospitals.

240 Approximately half of the patients with AE-IPF exhibited pulmonary emphysema, who

241 showed higher exposure to cigarette smoking, better FVC before AE, and higher levels of

242 KL-6 and SP-D at AE. The patients with emphysema had better short-term survival than

243 those without emphysema, although the long-term survival of the survivors was equivalent.

244 Several possibilities may explain why the presence of emphysema was associated with

245 better short-term prognosis in patients with IPF. First, the higher baseline FVC observed in

246 the IPF with emphysema group may have contributed to a better survival rate. However,

247 several studies have demonstrated that higher FVC values were not associated with better

248 prognosis in patients with AE of chronic fibrosing interstitial pneumonia (CFIP).[14,15]

249 Furthermore, the co-presence of emphysema may have masked the decrease in FVC in the

250 IPF with emphysema group and greater FVC does not suggest a better capacity for alveolar

251 gas exchange, which is essential for favorable oxygenation. In fact, there was no difference

252 in the P/F ratio at exacerbation, an essential factor associated with the poor prognosis of AE-

253 IPF, between patients with and without emphysema. Ikuyama et al. also reported that

254 patients with CPFE had better baseline %FVC and better prognosis after exacerbation than

255 those with IPF alone;[16] however, there was no difference in the %DLCO or GAP score

256 between the groups. Therefore, the higher baseline FVC observed in the IPF with

257 emphysema group is unlikely to be the cause of the better short-term prognosis in these

258 patients. Although substantial FVC data were lacking in the present study, pulmonary

259 emphysema was an independent factor in determining the short-term prognosis even after

260 adjustment for FVC values.

261 Ikuyama et al. reported that patients with CPFE exhibited significantly lower serum KL-6

262 levels on admission and postulated that lung damage was less extensive in these patients.

263 [16] Another recent study also reported that higher serum KL-6 levels on admission were



1  
2  
3  
4  
5 264 associated with a poorer prognosis in patients with AE-IPF.[17] However, in our study, the  
6  
7 265 serum KL-6 levels were higher in patients with IPF and emphysema. Therefore, patients with  
8  
9 266 IPF and emphysema had better short-term survival, regardless of their serum KL-6 levels on  
10  
11 267 admission.

12  
13 268 The heterogeneity of prognosis in patients with AE-IPF may be due to different pathological  
14  
15 269 changes in the lungs during AE. Diffuse alveolar damage is the major pathological finding in  
16  
17 270 the lungs with AE-IPF in autopsy cases, accounting for approximately 80% of cases, followed  
18  
19 271 by alveolar hemorrhage.[18] In contrast, lung specimens obtained by surgical biopsy often  
20  
21 272 show organizing pneumonia. Churg et al.[19] reported that 6 of 12 patients with AE-CFIP  
22  
23 273 presented with organizing pneumonia and survived the acute phase, whereas half of the  
24  
25 274 patients presenting with diffuse alveolar damage died. Currently, there is no histopathological  
26  
27 275 information explaining the different prognoses of AE-IPF due to emphysema, and further  
28  
29 276 studies are required.

30  
31 277 The Kaplan–Meier estimate revealed significantly better short-term survival in the IPF with  
32  
33 278 emphysema group than in the IPF alone group. However, in the survivors of acute phase,  
34  
35 279 long-term prognosis was not significantly different between patients with and without  
36  
37 280 emphysema. The major cause of death was AE-IPF, observed in 33 cases, comprising 11  
38  
39 281 patients (52%) with emphysema and 22 patients (81%) without emphysema. This  
40  
41 282 observation may be consistent with a previous report which stated that patients with IPF who  
42  
43 283 never smoked and developed AE had poorer prognoses than those with IPF who  
44  
45 284 smoked.[17]

46  
47 285 This study has several limitations. First, this was a retrospective study of cases in two clinical  
48  
49 286 centers; therefore, the number of patients studied was limited. In addition, we could not  
50  
51 287 estimate the incidence of AEs in patients with IPF and pulmonary emphysema because of  
52  
53 288 the retrospective design of this study. Prospective multicenter studies, such as the Japan  
54  
55 289 Idiopathic Interstitial Pneumonias Registry are currently ongoing in Japan and are warranted.  
56  
57 290 Second, due to the real-world nature of the study, some clinical data, especially data on the  
58  
59  
60

1  
2  
3  
4  
5 291 diffusion capacity and/or the six-minute walk test, which are used to calculate GAP scores to  
6  
7 292 evaluate the IPF severity,[20,21] were missing in most cases. However, we propose that the  
8  
9 293 presence or absence of emphysema on thoracic CT may be associated with the prognosis  
10  
11 294 of AE, which is a leading cause of death in patients with IPF.  
12

13 295

14  
15 296 **Conclusion**

16  
17 297 Patients with AE-IPF and concomitant pulmonary emphysema had better short-term  
18  
19 298 prognoses than those without emphysema. Further studies are required to identify the  
20  
21 299 histopathological characteristics of AE-IPF lungs with emphysema associated with better  
22  
23 300 prognosis.  
24  
25  
26  
27  
28  
29  
30  
31  
32  
33  
34  
35  
36  
37  
38  
39  
40  
41  
42  
43  
44  
45  
46  
47  
48  
49  
50  
51  
52  
53  
54  
55  
56  
57  
58  
59  
60

1  
2  
3  
4  
5 302 **Abbreviations**  
6

7 303 AE, acute exacerbation; CFIP, chronic fibrosing interstitial pneumonia; CPFPE, combined  
8  
9 304 pulmonary fibrosis and emphysema; CT, computed tomography; FEV<sub>1</sub>, forced expiratory  
10  
11 305 volume in one second; FIO<sub>2</sub>, fraction of inhaled oxygen; FVC, forced vital capacity; IPF,  
12  
13 306 idiopathic pulmonary fibrosis; KL-6, Krebs von Lungen-6; PaO<sub>2</sub>, arterial partial oxygen  
14  
15 307 pressure; P/F ratio, PaO<sub>2</sub>/FIO<sub>2</sub> ratio; SpO<sub>2</sub>, oxygen saturation measured by pulse oximetry;  
16  
17 308 SP-D, surfactant protein D  
18  
19  
20  
21  
22  
23  
24  
25  
26  
27  
28  
29  
30  
31  
32  
33  
34  
35  
36  
37  
38  
39  
40  
41  
42  
43  
44  
45  
46  
47  
48  
49  
50  
51  
52  
53  
54  
55  
56  
57  
58  
59  
60

1  
2  
3  
4  
5 309 **Acknowledgements**  
6

7 310 None.  
8

9 311  
10

11 312 **Funding**  
12

13 313 This research received no specific grants from any funding agency in the public, commercial,  
14  
15 314 or not-for-profit sectors.  
16

17 315  
18

19 316 **Availability of data and material**  
20

21 317 The dataset used in this study is available from the corresponding author upon request.  
22

23 318  
24

25 319 **Authors' contributions**  
26

27 320 YH, TT, and KA participated in the conception and design of the study, analyzed and  
28  
29 321 interpreted the data, and wrote the manuscript. YH, TT, and KN evaluated radiological  
30  
31 322 images. FT, KE, JT, KT, KN, ST, NH, YI, and TO collected and analyzed the clinical data. All  
32  
33 323 authors read and approved the final draft.  
34

35 324  
36

37 325 **Competing interests**  
38

39 326 The authors declare no competing interests regarding of this study.  
40

41 327  
42

43 328 **Consent for publication**  
44

45 329 Informed consent was obtained from the Tokai University Hospital website as an opt-out.  
46  
47 330 Patients who were rejected were excluded.  
48

49 331  
50

51 332 **Ethics approval**  
52

53 333 This study was approved by the Institutional Review Board of Tokai University Hospital (17R-  
54  
55 334 198) and Tokai University Oiso Hospital (18R-241).  
56

57 335  
58  
59  
60

336 **References**

- 337 1 Natsuizaka M, Chiba H, Kuronuma K, et al. Epidemiologic survey of Japanese patients  
338 with idiopathic pulmonary fibrosis and investigation of ethnic differences. *Am J Respir*  
339 *Crit Care Med* 2014;190:773–9. doi: [10.1164/rccm.201403-0566OC](https://doi.org/10.1164/rccm.201403-0566OC).
- 340 2 Collard HR, Moore BB, Flaherty KR, et al. Acute exacerbations of idiopathic pulmonary  
341 fibrosis. *Am J Respir Crit Care Med* 2007;176:636–43. doi: [10.1164/rccm.200703-](https://doi.org/10.1164/rccm.200703-463PP)  
342 [463PP](https://doi.org/10.1164/rccm.200703-463PP).
- 343 3 Mejía M, Carrillo G, Rojas-Serrano J, et al. Idiopathic pulmonary fibrosis and  
344 emphysema: decreased survival associated with severe pulmonary arterial  
345 hypertension. *Chest* 2009;136:10–5. doi: [10.1378/chest.08-2306](https://doi.org/10.1378/chest.08-2306).
- 346 4 Cottin V, Nunes H, Brillet PY, et al. Combined pulmonary fibrosis and emphysema: a  
347 distinct underrecognised entity. *Eur Respir J* 2005;26:586–93. doi:  
348 [10.1183/09031936.05.00021005](https://doi.org/10.1183/09031936.05.00021005).
- 349 5 Usui K, Tanai C, Tanaka Y, et al. The prevalence of pulmonary fibrosis combined with  
350 emphysema in patients with lung cancer. *Respirology* 2011;16:326–31. doi:  
351 [10.1111/j.1440-1843.2010.01907.x](https://doi.org/10.1111/j.1440-1843.2010.01907.x).
- 352 6 Jiang CG, Fu Q, Zheng CM. Prognosis of combined pulmonary fibrosis and emphysema:  
353 comparison with idiopathic pulmonary fibrosis alone. *Ther Adv Respir Dis*  
354 2019;13:1753466619888119. doi: [10.1177/1753466619888119](https://doi.org/10.1177/1753466619888119).
- 355 7 Kishaba T, Shimaoka Y, Fukuyama H, et al. A cohort study of mortality predictors and  
356 characteristics of patients with combined pulmonary fibrosis and emphysema. *BMJ*  
357 *Open* 2012;2. doi: [10.1136/bmjopen-2012-000988](https://doi.org/10.1136/bmjopen-2012-000988).
- 358 8 Song JW, Hong SB, Lim CM, et al. Acute exacerbation of idiopathic pulmonary fibrosis:  
359 incidence, risk factors and outcome. *Eur Respir J* 2011;37:356–63. doi:  
360 [10.1183/09031936.00159709](https://doi.org/10.1183/09031936.00159709).
- 361 9 Kurashima K, Takayanagi N, Tsuchiya N, et al. The effect of emphysema on lung function  
362 and survival in patients with idiopathic pulmonary fibrosis. *Respirology* 2010;15:843–8.  
363 doi: [10.1111/j.1440-1843.2010.01778.x](https://doi.org/10.1111/j.1440-1843.2010.01778.x).
- 364 10 Kubota M, Kobayashi H, Quanjer PH, et al. Reference values for spirometry, including  
365 vital capacity, in Japanese adults calculated with the LMS method and compared with  
366 previous values. *Respir Investig* 2014;52:242–50. doi: [10.1016/j.resinv.2014.03.003](https://doi.org/10.1016/j.resinv.2014.03.003).
- 367 11 Hill A. The possible effects of the aggregation of the molecules of haemoglobin on its

- 1  
2  
3  
4  
5 368 dissociation curves. *J Physiol* 1910;40:4–7.  
6  
7  
8 369 12 Goddard PR, Nicholson EM, Laszlo G, et al. Computed tomography in pulmonary  
9 370 emphysema. *Clinical radiology* 1982;33(4):379-87 doi: 10.1016/s0009-9260(82)80301-  
10 371 2.  
11  
12  
13 372 13 Lynch DA, Sverzellati N, Travis WD, et al. Diagnostic criteria for idiopathic pulmonary  
14 373 fibrosis: a Fleischner Society White Paper. *The Lancet Respiratory medicine*  
15 374 2018;6(2):138-53 doi: 10.1016/S2213-2600(17)30433-2.  
16  
17  
18 375 14 Akira M, Kozuka T, Yamamoto S, et al. Computed tomography findings in acute  
19 376 exacerbation of idiopathic pulmonary fibrosis. *Am J Respir Crit Care Med*  
20 377 2008;178:372–8. doi: [10.1164/rccm.200709-1365OC](https://doi.org/10.1164/rccm.200709-1365OC).  
21  
22  
23 378 15 Oishi K, Aoe K, Mimura Y, et al. Survival from an acute exacerbation of idiopathic  
24 379 pulmonary fibrosis with or without direct hemoperfusion with a polymyxin B-immobilized  
25 380 fiber column: A retrospective analysis. *Intern Med* 2016;55:3551–59. doi:  
26 381 [10.2169/internalmedicine.55.6056](https://doi.org/10.2169/internalmedicine.55.6056).  
27  
28  
29 382 16 Ikuyama Y, Ushiki A, Kosaka M, et al. Prognosis of patients with acute exacerbation of  
30 383 combined pulmonary fibrosis and emphysema: a retrospective single-centre study. *BMC*  
31 384 *Pulm Med* 2020;20:144. doi: [10.1186/s12890-020-01185-9](https://doi.org/10.1186/s12890-020-01185-9).  
32  
33  
34 385 17 Kishaba T, Nagano H, Nei Y, et al. Clinical characteristics of idiopathic pulmonary fibrosis  
35 386 patients according to their smoking status. *J Thorac Dis* 2016;8:1112–20. doi:  
36 387 [10.21037/jtd.2016.03.89](https://doi.org/10.21037/jtd.2016.03.89).  
37  
38  
39 388 18 Oda K, Ishimoto H, Yamada S, et al. Autopsy analyses in acute exacerbation of idiopathic  
40 389 pulmonary fibrosis. *Respir Res* 2014;15:109. doi: [10.1186/s12931-014-0109-y](https://doi.org/10.1186/s12931-014-0109-y).  
41  
42  
43 390 19 Churg A, Müller NL, Silva CI, et al. Acute exacerbation (acute lung injury of unknown  
44 391 cause) in UIP and other forms of fibrotic interstitial pneumonias. *Am J Surg Pathol*  
45 392 2007;31:277–84. doi: [10.1097/01.pas.0000213341.70852.9d](https://doi.org/10.1097/01.pas.0000213341.70852.9d).  
46  
47  
48 393 20 Kobayashi H, Omori S, Nakashima K, et al. Modified GAP index for prediction of acute  
49 394 exacerbation of idiopathic pulmonary fibrosis in non-small cell lung cancer. *Respirology*  
50 395 2017;22:1379–85. doi: [10.1111/resp.13075](https://doi.org/10.1111/resp.13075).  
51  
52  
53 396 21 Ryerson CJ, Vittinghoff E, Ley B, et al. Predicting survival across chronic interstitial lung  
54 397 disease: the ILD-GAP model. *Chest* 2014;145:723–28. doi: [10.1378/chest.13-1474](https://doi.org/10.1378/chest.13-1474).  
55  
56  
57 398

1  
2  
3  
4  
5 **399 Figure legends**

6  
7  
8 400 Figure1.

9  
10 401 Kaplan–Meier survival curves for patients admitted to the hospital with AE-IPF with

11  
12 402 pulmonary emphysema (solid line, n = 29) and without emphysema (dashed line, n = 33).  
13  
14  
15  
16  
17  
18  
19  
20  
21  
22  
23  
24  
25  
26  
27  
28  
29  
30  
31  
32  
33  
34  
35  
36  
37  
38  
39  
40  
41  
42  
43  
44  
45  
46  
47  
48  
49  
50  
51  
52  
53  
54  
55  
56  
57  
58  
59  
60

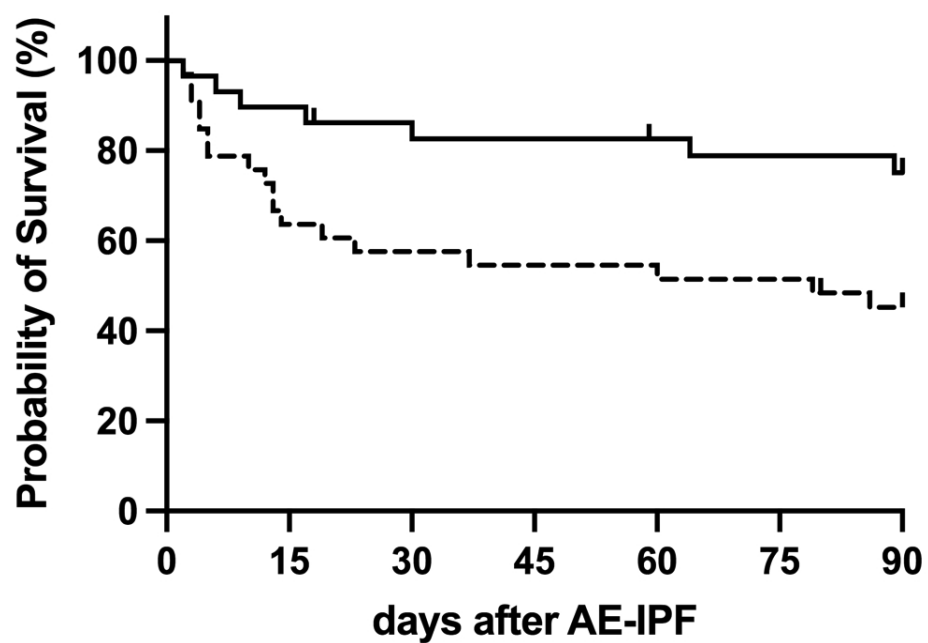

Figure 1

90x62mm (300 x 300 DPI)



## Supplemental material

### **Prognosis of acute exacerbation in idiopathic pulmonary fibrosis with pulmonary emphysema**

Yukihiro Horio<sup>1</sup>, Takahisa Takihara<sup>1</sup>, Fuminari Takahashi<sup>3</sup>, Keito Enokida<sup>1</sup>, Noriko  
Nakamura<sup>2</sup>, Jun Tanaka<sup>1</sup>, Katsuyoshi Tomomatsu<sup>1</sup>, Kyoko Niimi<sup>1</sup>, Sakurako Tajiri<sup>3</sup>, Naoki  
Hayama<sup>1</sup>, Yoko Ito<sup>1</sup> Tsuyoshi Oguma<sup>1</sup>, and Koichiro Asano<sup>1</sup>

<sup>1</sup>Division of Pulmonary Medicine, Department of Medicine, Kanagawa, Japan

<sup>2</sup>Department of Radiology, Tokai University School of Medicine, Kanagawa, Japan,

<sup>3</sup>Department of Medicine, Tokai University Oiso Hospital, Kanagawa, Japan

**Supplemental Table 1. Cox proportional hazards regression analysis of mortality within 90 days including data of forced vital capacity (FVC)**

|           | Hazard ratio | 95% confidence interval | P value |
|-----------|--------------|-------------------------|---------|
| Emphysema | 0.30         | 0.09-0.98               | 0.04    |

adjusted for age, sex, and %FVC>60%

FVC; forced vital capacity

## Supplemental Figure 1

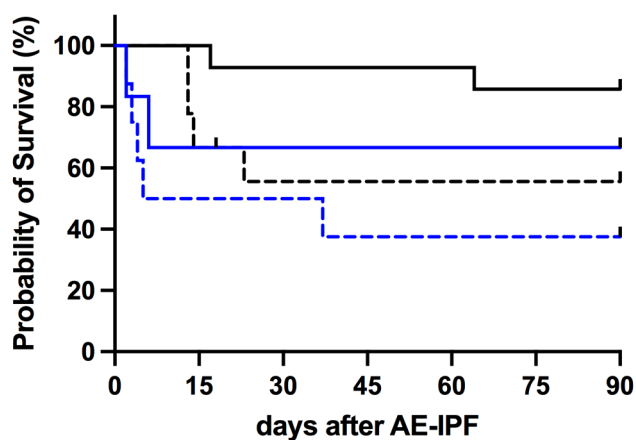

Kaplan–Meier survival curves for patients admitted to hospitals due to acute exacerbation of idiopathic pulmonary fibrosis. The patients were divided into four subgroups according to the presence or absence of pulmonary emphysema and baseline forced vital capacity (FVC  $\geq 60\%$  or  $< 60\%$  of the predicted value): group 1 (black solid line,  $n = 14$ , with emphysema and baseline FVC  $\geq 60\%$ ), group 2 (black dashed line,  $n = 9$ , without emphysema and baseline FVC  $\geq 60\%$ ), group 3 (blue solid line,  $n = 6$ , with emphysema and baseline FVC  $< 60\%$ ), and group 4 (blue dashed line,  $n = 8$ , without emphysema and baseline FVC  $< 60\%$ ).

**Supplemental Figure 2**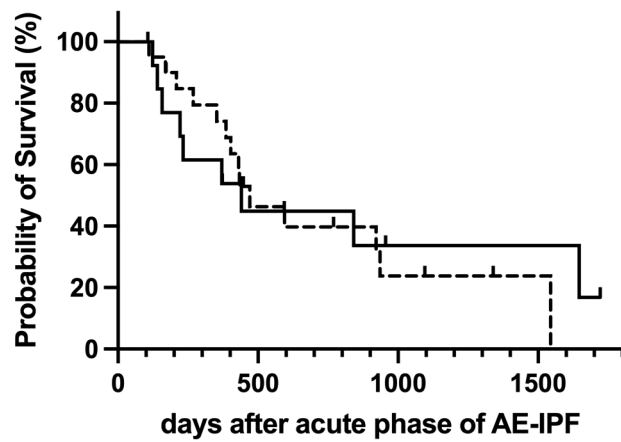

Kaplan-Meier survival curves for acute phase survivors (90 days) after acute exacerbation of idiopathic pulmonary fibrosis with pulmonary emphysema (solid line, n = 22) and without emphysema (dashed line, n = 16).

STROBE Statement—Checklist of items that should be included in reports of *cross-sectional studies*

|                              | Item No | Recommendation                                                                                                                                                                                               | Page No |
|------------------------------|---------|--------------------------------------------------------------------------------------------------------------------------------------------------------------------------------------------------------------|---------|
| <b>Title and abstract</b>    | 1       | (a) Indicate the study's design with a commonly used term in the title or the abstract                                                                                                                       | 1.2     |
|                              |         | (b) Provide in the abstract an informative and balanced summary of what was done and what was found                                                                                                          | 1.2     |
| <b>Introduction</b>          |         |                                                                                                                                                                                                              |         |
| Background/rationale         | 2       | Explain the scientific background and rationale for the investigation being reported                                                                                                                         | 4       |
| Objectives                   | 3       | State specific objectives, including any prespecified hypotheses                                                                                                                                             | 4       |
| <b>Methods</b>               |         |                                                                                                                                                                                                              |         |
| Study design                 | 4       | Present key elements of study design early in the paper                                                                                                                                                      | 5       |
| Setting                      | 5       | Describe the setting, locations, and relevant dates, including periods of recruitment, exposure, follow-up, and data collection                                                                              | 5       |
| Participants                 | 6       | (a) Give the eligibility criteria, and the sources and methods of selection of participants                                                                                                                  | 5-6     |
| Variables                    | 7       | Clearly define all outcomes, exposures, predictors, potential confounders, and effect modifiers. Give diagnostic criteria, if applicable                                                                     | 5-6     |
| Data sources/<br>measurement | 8*      | For each variable of interest, give sources of data and details of methods of assessment (measurement). Describe comparability of assessment methods if there is more than one group                         | 5-6     |
| Bias                         | 9       | Describe any efforts to address potential sources of bias                                                                                                                                                    | 5       |
| Study size                   | 10      | Explain how the study size was arrived at                                                                                                                                                                    | 5       |
| Quantitative variables       | 11      | Explain how quantitative variables were handled in the analyses. If applicable, describe which groupings were chosen and why                                                                                 | N/A     |
| Statistical methods          | 12      | (a) Describe all statistical methods, including those used to control for confounding                                                                                                                        | 6-7     |
|                              |         | (b) Describe any methods used to examine subgroups and interactions                                                                                                                                          | 6-7     |
|                              |         | (c) Explain how missing data were addressed                                                                                                                                                                  |         |
|                              |         | (d) If applicable, describe analytical methods taking account of sampling strategy                                                                                                                           | N/A     |
|                              |         | (e) Describe any sensitivity analyses                                                                                                                                                                        | 6-7     |
| <b>Results</b>               |         |                                                                                                                                                                                                              |         |
| Participants                 | 13*     | (a) Report numbers of individuals at each stage of study—eg numbers potentially eligible, examined for eligibility, confirmed eligible, included in the study, completing follow-up, and analysed            | 8       |
|                              |         | (b) Give reasons for non-participation at each stage                                                                                                                                                         | N/A     |
|                              |         | (c) Consider use of a flow diagram                                                                                                                                                                           |         |
| Descriptive data             | 14*     | (a) Give characteristics of study participants (eg demographic, clinical, social) and information on exposures and potential confounders                                                                     | 8-9     |
|                              |         | (b) Indicate number of participants with missing data for each variable of interest                                                                                                                          | 8       |
| Outcome data                 | 15*     | Report numbers of outcome events or summary measures                                                                                                                                                         | 9-10    |
| Main results                 | 16      | (a) Give unadjusted estimates and, if applicable, confounder-adjusted estimates and their precision (eg, 95% confidence interval). Make clear which confounders were adjusted for and why they were included | 9-10    |

|                          |    |                                                                                                                                                                            |       |
|--------------------------|----|----------------------------------------------------------------------------------------------------------------------------------------------------------------------------|-------|
|                          |    | (b) Report category boundaries when continuous variables were categorized                                                                                                  | N/A   |
|                          |    | (c) If relevant, consider translating estimates of relative risk into absolute risk for a meaningful time period                                                           | N/A   |
| Other analyses           | 17 | Report other analyses done—eg analyses of subgroups and interactions, and sensitivity analyses                                                                             | 9-10  |
| <b>Discussion</b>        |    |                                                                                                                                                                            |       |
| Key results              | 18 | Summarise key results with reference to study objectives                                                                                                                   | 11    |
| Limitations              | 19 | Discuss limitations of the study, taking into account sources of potential bias or imprecision. Discuss both direction and magnitude of any potential bias                 | 12-13 |
| Interpretation           | 20 | Give a cautious overall interpretation of results considering objectives, limitations, multiplicity of analyses, results from similar studies, and other relevant evidence | 11-12 |
| Generalisability         | 21 | Discuss the generalisability (external validity) of the study results                                                                                                      | 11-12 |
| <b>Other information</b> |    |                                                                                                                                                                            |       |
| Funding                  | 22 | Give the source of funding and the role of the funders for the present study and, if applicable, for the original study on which the present article is based              | 15    |

\*Give information separately for exposed and unexposed groups.

**Note:** An Explanation and Elaboration article discusses each checklist item and gives methodological background and published examples of transparent reporting. The STROBE checklist is best used in conjunction with this article (freely available on the Web sites of PLoS Medicine at <http://www.plosmedicine.org/>, Annals of Internal Medicine at <http://www.annals.org/>, and Epidemiology at <http://www.epidem.com/>). Information on the STROBE Initiative is available at [www.strobe-statement.org](http://www.strobe-statement.org).

# BMJ Open

## Prognosis of acute exacerbation in idiopathic pulmonary fibrosis with pulmonary emphysema: a retrospective cohort study in Japan

|                                 |                                                                                                                                                                                                                                                                                                                                                                                                                                                                                                                                                                                                                                                                                                                                                                                                                                                                                                                                                                                                                                                                                                                                                                           |
|---------------------------------|---------------------------------------------------------------------------------------------------------------------------------------------------------------------------------------------------------------------------------------------------------------------------------------------------------------------------------------------------------------------------------------------------------------------------------------------------------------------------------------------------------------------------------------------------------------------------------------------------------------------------------------------------------------------------------------------------------------------------------------------------------------------------------------------------------------------------------------------------------------------------------------------------------------------------------------------------------------------------------------------------------------------------------------------------------------------------------------------------------------------------------------------------------------------------|
| Journal:                        | <i>BMJ Open</i>                                                                                                                                                                                                                                                                                                                                                                                                                                                                                                                                                                                                                                                                                                                                                                                                                                                                                                                                                                                                                                                                                                                                                           |
| Manuscript ID                   | bmjopen-2022-062236.R1                                                                                                                                                                                                                                                                                                                                                                                                                                                                                                                                                                                                                                                                                                                                                                                                                                                                                                                                                                                                                                                                                                                                                    |
| Article Type:                   | Original research                                                                                                                                                                                                                                                                                                                                                                                                                                                                                                                                                                                                                                                                                                                                                                                                                                                                                                                                                                                                                                                                                                                                                         |
| Date Submitted by the Author:   | 08-Jun-2022                                                                                                                                                                                                                                                                                                                                                                                                                                                                                                                                                                                                                                                                                                                                                                                                                                                                                                                                                                                                                                                                                                                                                               |
| Complete List of Authors:       | <p>Horio, Yukihiro; Tokai University School of Medicine Graduate School of Medicine<br/> Takahara, Takahisa; Tokai University School of Medicine Graduate School of Medicine<br/> Takahashi, Fuminari; Tokai University Oiso Hospital, Department of Medicine<br/> Enokida, Keito; Tokai University School of Medicine Graduate School of Medicine<br/> Nakamura, Noriko; Tokai University School of Medicine, Department of Radiology<br/> Tanaka, Jun; Tokai University School of Medicine Graduate School of Medicine<br/> Tomomatsu, Katsuyoshi; Tokai University School of Medicine Graduate School of Medicine<br/> Niimi, Kyoko; Tokai University School of Medicine Graduate School of Medicine<br/> Tajiri, Sakurako; Tokai University Oiso Hospital, Department of Medicine<br/> Hayama, Naoki; Tokai University School of Medicine Graduate School of Medicine<br/> Ito, Yoko; Tokai University School of Medicine Graduate School of Medicine<br/> Oguma, Tsuyoshi; Tokai University School of Medicine Graduate School of Medicine<br/> Asano, Koichiro; Tokai University School of Medicine Graduate School of Medicine, Division of Pulmonary Medicine</p> |
| <b>Primary Subject Heading</b>: | Respiratory medicine                                                                                                                                                                                                                                                                                                                                                                                                                                                                                                                                                                                                                                                                                                                                                                                                                                                                                                                                                                                                                                                                                                                                                      |
| Secondary Subject Heading:      | Intensive care, Medical management                                                                                                                                                                                                                                                                                                                                                                                                                                                                                                                                                                                                                                                                                                                                                                                                                                                                                                                                                                                                                                                                                                                                        |
| Keywords:                       | Interstitial lung disease < THORACIC MEDICINE, Emphysema < THORACIC MEDICINE, Adult intensive & critical care < INTENSIVE & CRITICAL CARE                                                                                                                                                                                                                                                                                                                                                                                                                                                                                                                                                                                                                                                                                                                                                                                                                                                                                                                                                                                                                                 |
|                                 |                                                                                                                                                                                                                                                                                                                                                                                                                                                                                                                                                                                                                                                                                                                                                                                                                                                                                                                                                                                                                                                                                                                                                                           |

1  
2  
3  
4  
5  
6  
7  
8  
9  
10  
11  
12  
13  
14  
15  
16  
17  
18  
19  
20  
21  
22  
23  
24  
25  
26  
27  
28  
29  
30  
31  
32  
33  
34  
35  
36  
37  
38  
39  
40  
41  
42  
43  
44  
45  
46  
47  
48  
49  
50  
51  
52  
53  
54  
55  
56  
57  
58  
59  
60

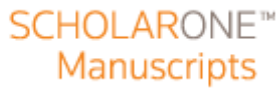





I, the Submitting Author has the right to grant and does grant on behalf of all authors of the Work (as defined in the below author licence), an exclusive licence and/or a non-exclusive licence for contributions from authors who are: i) UK Crown employees; ii) where BMJ has agreed a CC-BY licence shall apply, and/or iii) in accordance with the terms applicable for US Federal Government officers or employees acting as part of their official duties; on a worldwide, perpetual, irrevocable, royalty-free basis to BMJ Publishing Group Ltd ("BMJ") its licensees and where the relevant Journal is co-owned by BMJ to the co-owners of the Journal, to publish the Work in this journal and any other BMJ products and to exploit all rights, as set out in our [licence](#).

The Submitting Author accepts and understands that any supply made under these terms is made by BMJ to the Submitting Author unless you are acting as an employee on behalf of your employer or a postgraduate student of an affiliated institution which is paying any applicable article publishing charge ("APC") for Open Access articles. Where the Submitting Author wishes to make the Work available on an Open Access basis (and intends to pay the relevant APC), the terms of reuse of such Open Access shall be governed by a Creative Commons licence – details of these licences and which [Creative Commons](#) licence will apply to this Work are set out in our licence referred to above.

Other than as permitted in any relevant BMJ Author's Self Archiving Policies, I confirm this Work has not been accepted for publication elsewhere, is not being considered for publication elsewhere and does not duplicate material already published. I confirm all authors consent to publication of this Work and authorise the granting of this licence.

1  
2  
3  
4  
5  
6 1 **Prognosis of acute exacerbation in idiopathic pulmonary fibrosis**  
7  
8 2 **with pulmonary emphysema: a retrospective cohort study in Japan**  
9

10 3  
11  
12 4 Yukihiro Horio<sup>1</sup>, Takahisa Takihara<sup>1</sup>, Fuminari Takahashi<sup>3</sup>, Keito Enokida<sup>1</sup>, Noriko  
13  
14 5 Nakamura<sup>2</sup>, Jun Tanaka<sup>1</sup>, Katsuyoshi Tomomatsu<sup>1</sup>, Kyoko Niimi<sup>1</sup>, Sakurako Tajiri<sup>3</sup>, Naoki  
15  
16 6 Hayama<sup>1</sup>, Yoko Ito<sup>1</sup> Tsuyoshi Oguma<sup>1</sup>, and Koichiro Asano<sup>1</sup>  
17  
18 7

19  
20 8 <sup>1</sup>Division of Pulmonary Medicine, Department of Medicine, <sup>2</sup>Department of Radiology, Tokai  
21  
22 9 University School of Medicine, Kanagawa, Japan, <sup>3</sup>Department of Medicine, Tokai  
23  
24 10 University Oiso Hospital, Kanagawa, Japan  
25

26 11  
27 12  
28 13 **Corresponding author**

29 14 Koichiro Asano, MD  
30  
31 15 Division of Pulmonary Medicine, Department of Medicine  
32  
33 16 Tokai University School of Medicine  
34  
35 17 143 Shimokasuya, Isehara, Kanagawa 259-1193, Japan  
36  
37 18 Phone: +81-463-93-1121  
38  
39 19 Fax: +81-463-93-0381  
40  
41 20 E-mail: ko-asano@tokai-u.jp  
42  
43  
44  
45  
46  
47  
48  
49  
50  
51  
52  
53  
54  
55  
56  
57  
58  
59  
60

22 Word count:

23 Abstract: 199 words

24 Manuscript: 3639 words

1  
2  
3  
4  
5  
6  
7  
8  
9  
10  
11  
12  
13  
14  
15  
16  
17  
18  
19  
20  
21  
22  
23  
24  
25  
26  
27  
28  
29  
30  
31  
32  
33  
34  
35  
36  
37  
38  
39  
40  
41  
42  
43  
44  
45  
46  
47  
48  
49  
50  
51  
52  
53  
54  
55  
56  
57  
58  
59  
60

26 **Abstract**

27 **Objectives:** To analyze the clinical characteristics and prognosis of acute exacerbation (AE)  
28 in patients with idiopathic pulmonary fibrosis (IPF) and pulmonary emphysema.

29 **Design:** A multicenter retrospective cohort study

30 **Setting:** Two university hospitals in Japan

31 **Participants:** Patients admitted to hospitals due to AE of IPF diagnosed based on a  
32 multidisciplinary discussion.

33 **Interventions:** None

34 **Primary and secondary outcome measures:** 90-day mortality rate

35 **Methods:** We retrospectively analyzed consecutive patients with AE of IPF, with or without  
36 pulmonary emphysema, admitted to two university hospitals between 2007 and 2018.

37 **Results:** Among 62 patients (median age, 75 years; 48 men) admitted for AE of IPF, 29  
38 patients (46%) presented with concomitant pulmonary emphysema. There was no significant  
39 difference in the arterial partial oxygen pressure/fraction of inhaled oxygen (P/F) ratio or other  
40 laboratory and radiographic data between patients with and without emphysema. The 90-day  
41 mortality rate was significantly lower in patients with emphysema than in those with IPF alone  
42 (23% vs. 52%,  $p = 0.03$ ). The median survival time was significantly longer in patients with  
43 emphysema than in those with IPF alone (405 vs. 242 days,  $p = 0.02$ ).

44 **Conclusion:** Patients with IPF and emphysema had better short-term survival after AE than  
45 those with non-emphysematous IPF.

1  
2  
3  
4  
5  
6  
7  
8  
9  
10  
11  
12  
13  
14  
15  
16  
17  
18  
19  
20  
21  
22  
23  
24  
25  
26  
27  
28  
29  
30  
31  
32  
33  
34  
35  
36  
37  
38  
39  
40  
41  
42  
43  
44  
45  
46  
47  
48  
49  
50  
51  
52  
53  
54  
55  
56

## 46 **Strengths and limitations of this study**

- 47 ● The studied population was patients with idiopathic pulmonary fibrosis (IPF) who  
48 developed acute exacerbations.
  - 49 ● The diagnosis of IPF, emphysema, and acute exacerbation was based on a  
50 multidisciplinary discussion by pulmonary physicians and a radiologist.
  - 51 ● The number of patients studied was limited as a retrospective study in two clinical  
52 centers.
  - 53 ● The incidence of acute exacerbation among patients with IPF with or without  
54 emphysema could not be analyzed because of the retrospective design of this study.
  - 55 ● Some data such as pulmonary function tests prior to acute exacerbation were not  
56 available.
- For peer review only

## 57 **Background**

58 Idiopathic pulmonary fibrosis (IPF) is characterized by chronic, progressive, fibrosing  
59 interstitial pneumonia of unknown etiology. The prognosis of IPF is poor, with a median  
60 survival time of 2–3 years. Acute exacerbation (AE) is the major cause of death in IPF  
61 patients, accounting for up to 40% of all deaths.[1] AE-IPF is defined as the worsening of  
62 respiratory failure with acute or subacute onset that cannot be explained by cardiac failure  
63 or fluid overload, which parallels the Berlin criteria for acute respiratory distress syndrome.[2]

64 Pulmonary emphysema is common in lungs with IPF, as the estimated prevalence of  
65 emphysema ranges between 25% and 50%.[3] Cottin et al. proposed the term combined  
66 pulmonary fibrosis and emphysema (CPFE), which comprises upper lobe-dominant  
67 emphysema and lower lobe-dominant fibrosis.[4] CPFE exhibits clinical characteristics, such  
68 as high prevalence in heavy smokers, relatively normal lung volumes accompanied by  
69 severely impaired gas exchange capacity, and a high risk for lung cancer and pulmonary  
70 arterial hypertension.[3-5] Data on the prognosis of IPF with emphysema are inconsistent  
71 among reports although recent studies have reported that the prognosis of CPFE is as poor  
72 as that of IPF alone.[6]

73 The incidence of AEs in patients with CPFE has been reported to be 9.4% per year [7],  
74 which is compatible with the annual rate of AEs in patients with IPF.[8] In contrast, AEs  
75 accounted for 31% of deaths in patients with IPF, but accounted for only 11.8% of deaths in  
76 patients with CPFE.[9] Other causes, such as lung cancer and pulmonary artery hypertension,  
77 may play a major role in the mortality of patients with IPF and emphysema.[3,4] Another  
78 possible explanation is that the prognosis of AE is better in patients with combined fibrosis  
79 and emphysema than in patients with IPF alone. Therefore, we analyzed the clinical  
80 characteristics and prognoses of patients with AE of IPF and pulmonary emphysema.

81

82

## 83 **Methods**

1  
2  
3  
4  
5 84 *Patients*  
6

7 85 Consecutive patients admitted to two university hospitals for AE-IPF between January 2007  
8  
9 86 and August 2018 were retrospectively analyzed. IPF was diagnosed based on a  
10  
11 87 multidisciplinary discussion (MDD) by two pulmonologists and a radiologist using the  
12  
13 88 patients' clinical history, physical examination, laboratory test results, and radiographic data  
14  
15 89 from high-resolution computed tomography (HRCT).  
16

17 90 AE-IPF was diagnosed based on the following criteria:[2] 1) previous or concurrent diagnosis  
18  
19 91 of IPF; (2) acute worsening or development of dyspnea typically of duration <1 month; 3)  
20  
21 92 computed tomography with new bilateral ground-glass opacity and/or consolidation  
22  
23 93 superimposed on a background pattern consistent with the usual interstitial pneumonia  
24  
25 94 pattern; and 4) deterioration not fully explained by cardiac failure or fluid overload. The  
26  
27 95 patients with neoplasms undergoing active treatment, including radiation therapy,  
28  
29 96 chemotherapy with cytotoxic or molecular-targeted drugs, or immunotherapy with immune  
30  
31 97 checkpoint inhibitors, at the onset of AE were excluded.  
32

33 98 AE-IPF was treated with an appropriate administration of oxygen and pharmacotherapy using  
34  
35 99 prednisone (0.5–1 mg/kg per day) with or without preceding methylprednisolone pulse  
36  
37 100 therapy (1 g/day for 3 days). The prednisone dose was tapered based on the response to  
38  
39 101 therapy. In refractory cases, immunosuppressive therapy with intravenous  
40  
41 102 cyclophosphamide (500 mg every 2–4 weeks) may have been added.  
42

43 103 This study was approved by the Institutional Review Board of Tokai University Hospital (17R-  
44  
45 104 198) and Tokai University Oiso Hospital (18R-241), and was conducted in compliance with  
46  
47 105 the principles of the Declaration of Helsinki. Informed consent was obtained from the Tokai  
48  
49 106 University Hospital website as an opt-out. Patients who rejected were excluded.  
50

51 107

52  
53 108 *Clinical and laboratory parameters*  
54

55 109 The clinical and laboratory data within 12 months prior to and at the onset of AE were  
56  
57 110 collected from medical charts. Spirometry was performed during stable disease using a  
58  
59  
60

1  
2  
3  
4  
5 111 Super Spiro DISCOM-21FX III spirometer (CHEST Corp., Tokyo, Japan) by trained clinical  
6  
7 112 technicians. The predicted values of forced vital capacity (FVC) and forced expiratory volume  
8  
9 113 in 1 s (FEV<sub>1</sub>) were calculated using a previously reported equation.[10] In patients without  
10  
11 114 arterial blood gas data at the time of admission, the partial pressure of arterial oxygen (PaO<sub>2</sub>)  
12  
13 115 was calculated based on percutaneous arterial oxygen saturation (SpO<sub>2</sub>) using the Hill  
14  
15 116 formula.[11] The serum levels of Krebs von Lungen-6 (KL-6) were measured using an  
16  
17 117 electrochemi-luminescence immunoassay and Lumipulse G1200 Analyzer (Rebio, Fuji,  
18  
19 118 Japan). The surfactant protein D (SP-D) levels were measured using commercially available  
20  
21 119 enzyme-linked immunosorbent assay kits (RayBiotech, Norcross, GA, USA).  
22

23  
24 120

#### 25 121 *Radiographic evaluation of thoracic CT and diagnosis IPF*

26  
27 122 Thoracic CT with 1.5-mm-thick axial sections was obtained at 1-cm intervals throughout the  
28  
29 123 entire thorax in the inspiratory phase. Emphysema was defined as demarcated areas of  
30  
31 124 decreased attenuation compared to contiguous normal lung tissue and marginated by a very  
32  
33 125 thin or no wall, with upper-zone predominance. The extent of emphysema was evaluated by  
34  
35 126 low attenuation area (LAA) score in chest CT according to the method proposed by Goddard  
36  
37 127 et al. [12] The cases with LAA score > 0 was classified in the emphysema group. The  
38  
39 128 existence of emphysema and diagnostic categories of usual interstitial pneumonia (UIP)  
40  
41 129 based on CT patterns [12,13] were diagnosed based on a discussion between two  
42  
43 130 pulmonologists and a radiologist.  
44

45  
46 131

#### 47 132 *Statistical analysis*

48  
49 133 The data are expressed as mean ± standard deviation or median and interquartile range for  
50  
51 134 continuous variables, and number and percentage for categorical data. Group comparisons  
52  
53 135 were made using the Mann–Whitney U test for continuous variables and Fisher's exact test  
54  
55 136 for categorical variables. Kaplan–Meier survival curves and log-rank tests were used to  
56  
57 137 evaluate the survival. Cox proportional hazards regression analysis of mortality within 90  
58  
59  
60

1  
2  
3  
4  
5 138 days was performed using age, sex, and other factors with  $p < 0.1$  in univariate analysis and  
6  
7 139 data available in  $> 90\%$  of the cases. A statistical analysis was performed using IBM SPSS  
8  
9 140 Statistics software ver. 21 (IBM, Chicago, IL, USA). The level of statistical significance was  
10  
11 141 set at  $p < 0.05$ .

12  
13 142

#### 14 143 *Patient and public involvement*

15 144 This was a retrospective cohort study with no direct patient and public engagement.

16 145

### 17 146 **Results**

#### 18 147 *Clinical characteristics prior to AE*

19 148 Among 103 patients admitted to hospitals due to acute respiratory failure of idiopathic  
20 149 interstitial pneumonia during the study period, we identified 62 patients with AE-IPF (median  
21 150 age, 75 years; 48 men and 14 women, Supplemental Figure 1). Notably, 29 patients (46.7%)  
22 151 had emphysema (IPF with emphysema group) and 33 patients had IPF without emphysema  
23 152 (IPF alone group).

24 153 The clinical characteristics at baseline (within 12 months before AE) are presented in Table  
25 154 1. All the patients with emphysema were smokers, whereas 19 patients (58%) with IPF alone  
26 155 were never smokers. The total exposure to cigarette smoke (pack-years) was greater in the  
27 156 IPF with emphysema group than in the IPF alone group ( $p < 0.001$ ). Age, sex, body mass  
28 157 index, proportion of patients with co-morbidities, under long-term oxygen therapy, or on  
29 158 pharmacotherapy with prednisolone or antifibrotic agents were not significantly different  
30 159 between the groups. The data of pulmonary function tests within one year prior to AE were  
31 160 available in 20 cases in the IPF with emphysema group and 17 cases in the IPF alone group.  
32 161 The FVC, %FVC of the predicted value, and FEV<sub>1</sub> were significantly higher in the IPF with  
33 162 emphysema group ( $p = 0.045$ ,  $0.002$ , and  $0.001$ , respectively), whereas the FEV<sub>1</sub>/FVC was  
34 163 not significantly different between the groups. The diagnostic categories of UIP based on CT



164 patterns were not significantly different between the groups. One case, which was  
 165 categorized as an alternative pattern, was diagnosed as IPF upon autopsy.

**Table 1. Baseline characteristics in patients with idiopathic pulmonary fibrosis with or without concomitant pulmonary emphysema**

| Characteristic                              | IPF with emphysema<br>(n=29) | IPF alone<br>(n=33) | P value |
|---------------------------------------------|------------------------------|---------------------|---------|
| Age, years                                  | 74±6                         | 76 ± 8              | 0.20    |
| Male, n (%)                                 | 28 (97%)                     | 20 (60%)            |         |
| Body mass index                             | 21.9 ± 3.2 (n=25)            | 22.7 ± 4.3 (n=29)   | 0.40    |
| Smoking status                              |                              |                     |         |
| Smokers, n (%)                              | 29 (100%)                    | 14 (42%)            | <0.001  |
| Pack-years                                  | 59±68                        | 12 ± 20             | <0.001  |
| Co-morbidity                                |                              |                     |         |
| Lung cancer, n (%)                          | 2 (7%)                       | 1 (3%)              | 0.59    |
| Any cancer, n (%)                           | 5 (17%)                      | 3 (9%)              | 0.33    |
| Diabetes mellitus, n (%)                    | 6 (21%)                      | 10 (30%)            | 0.38    |
| Chronic heart failure, n (%)                | 6 (21%)                      | 13 (39%)            | 0.11    |
| Chronic renal failure, n (%)                | 0 (0%)                       | 2 (6%)              | 0.59    |
| Chronic respiratory infection, n (%)        | 1 (3%)                       | 1 (3%)              | 0.93    |
| Laboratory data                             |                              |                     |         |
| KL-6 in serum (U/mL)                        | 1266±697 (n=24)              | 1255 ± 817 (n=26)   | 0.74    |
| Albumin in serum (g/mL)                     | 3.7 ± 0.5 (n=20)             | 3.7 ± 0.3 (n=23)    | 0.64    |
| Pulmonary functions                         | n=20                         | n=17                |         |
| FVC (L)                                     | 2.26±0.68                    | 1.54 ± 0.61         | 0.045   |
| FVC, %predicted                             | 69.4±20.3                    | 56.8 ± 22.4         | 0.002   |
| FEV <sub>1</sub> (L)                        | 1.9±0.5                      | 1.3±0.4             | 0.001   |
| FEV <sub>1</sub> /FVC (%)                   | 85.9±7.6                     | 89.3 ± 9.2          | 0.11    |
| Thoracic computed tomography                |                              |                     |         |
| CT pattern (2018 IPF guideline)             |                              |                     |         |
| Definite/Probable/Indeterminate/Alternative | 21/7/0/1                     | 14/19/0/0           | 0.08    |
| Low-attenuation area score                  | 5.8 ± 2.0                    | 0.0 ± 0.0           | #       |
| Treatment, n (%)                            |                              |                     |         |
| Prednisolone                                | 7 (24%)                      | 8 (24%)             | 0.99    |
| Antifibrotic agents                         | 6 (20%)                      | 3 (9%)              | 0.13    |

IPF, interstitial pulmonary fibrosis; FVC, forced vital capacity; FEV<sub>1</sub>, forced expiratory volume in one second; KL-6, Krebs von Lungen-6

166

167 *Clinical characteristics upon admission due to AE*

168 The laboratory data upon admission, such as leukocyte counts in peripheral blood and serum  
 169 levels of lactate dehydrogenase, were not significantly different between the IPF with  
 170 emphysema and IPF alone groups (Table 2). In addition, the fraction of inhaled oxygen (FIO<sub>2</sub>)  
 171 and the PaO<sub>2</sub>/FIO<sub>2</sub> (P/F) ratio were not significantly different between the groups. The serum  
 172 KL-6 and SP-D levels were higher in the IPF with emphysema group ( $p = 0.05$  and  $0.025$ ,  
 173 respectively).

**Table 2. Clinical characteristics on admission due to acute exacerbation**

|                                   | IPF with emphysema<br>(n=29) | IPF alone<br>(n=33) | P value |
|-----------------------------------|------------------------------|---------------------|---------|
| Respiratory rate (/min)           | 23±5                         | 25±6                | 0.18    |
| Laboratory data                   |                              |                     |         |
| Leukocytes (×10 <sup>3</sup> /μL) | 10.1±3.1                     | 11.0±5.1            | 0.27    |
| Lactate dehydrogenase (U/L)       | 377±164                      | 372±103             | 0.60    |
| KL-6 (U/mL)                       | 2109±1249                    | 1644±1193           | 0.049   |
| SP-D (U/mL) (n=46)                | 599±380 (n=24)               | 388±305 (n=22)      | 0.025   |
| BNP (pg/mL) (n=47)                | 116±149 (n=24)               | 166±194 (n=23)      | 0.25    |
| FIO <sub>2</sub>                  | 0.38±0.24                    | 0.33±0.20           | 0.94    |
| P/F ratio                         | 233±105                      | 221±80              | 0.51    |
| Treatment, n (%)                  |                              |                     |         |
| Drug                              |                              |                     |         |
| High dose corticosteroids         | 29 (100%)                    | 32 (97%)            | -       |
| Methylprednisolone pulse therapy  | 17 (58%)                     | 22 (66%)            | 0.51    |
| Immunosuppressive therapy         | 3 (10%)                      | 4 (12%)             | 0.45    |
| Oxygen therapy                    |                              |                     |         |
| High flow nasal cannula           | 4 (13%)                      | 8 (24%)             | 0.29    |
| NIPPV                             | 0 (0%)                       | 2 (6%)              | 0.49    |
| IPPV                              | 0 (0%)                       | 2 (6%)              | 0.49    |
| Do-not-resuscitation order, n (%) | 29 (100%)                    | 31 (94%)            | 0.92    |

AE, acute exacerbation; IPF, interstitial pulmonary fibrosis; KL-6, Krebs von Lungen-6;

SP-D, surfactant protein D; P/F ratio, PaO<sub>2</sub>/FIO<sub>2</sub> ratio; SIRS, systemic inflammatory response syndrome;

NIPPV, non-invasive intermittent positive pressure ventilation; IPPV, intermittent positive pressure ventilation.

174 All the patients, except for one patient who was not treated with prednisolone, were treated  
 175 with high-dose prednisolone and oxygen therapy. There was no difference in the proportion  
 176 of patients treated with methylprednisolone pulse therapy and/or immunosuppressive

177 therapy between the groups. Four patients with IPF and emphysema and 12 patients with  
 178 IPF alone required a high-flow nasal cannula or positive-pressure ventilation for the treatment  
 179 of respiratory failure.

180

### 181 *Short-term prognosis within 90 days after admission*

182 Nine (15%), 15 (24%), and 23 (38%) patients died within 7, 30, and 90 days of admission  
 183 due to AE-IPF, respectively. The survivors were more likely to have emphysema (56%) than  
 184 the deceased (30%), with an odds ratio of 0.27 (95% CI, 0.07–0.88;  $p = 0.02$ ). FVC and P/F  
 185 ratio were lower ( $p = 0.02$  and 0.06, respectively) in the deceased patients (Table 3). The  
 186 survival rate was significantly higher in patients with emphysema than in those without  
 187 emphysema ( $p = 0.03$ ), and the 90-days survival rate was higher in patients with emphysema  
 188 (76% and 50%, respectively; Figure 1). The age, sex, smoking history (pack-years), serum  
 189 KL-6 levels, comorbidity of lung cancer, long-term oxygen therapy, and the proportion of  
 190 patients using prednisolone and/or antifibrotic agents before AE were not significantly  
 191 different between patients who died and those who survived for the first 90 days (Table 3). A  
 192 Cox proportional hazards regression analysis revealed that the presence of emphysema  
 193 (hazard ratio 0.33 [95%CI 0.14–0.82],  $p = 0.01$ ) and P/F ratio (hazard ratio 0.99 [95%CI 0.98–  
 194 0.99],  $p = 0.01$ ) were predictors of mortality within 90 days after adjustment for age and sex  
 195 (Table 4).

**Table 3. Clinical characteristics of non-survivors and survivors at day 90**

|                                          | Non-survivors<br>at day 90<br>(n=23) | Survivors<br>at day 90<br>(n=36) | P value |
|------------------------------------------|--------------------------------------|----------------------------------|---------|
| <b>Baseline clinical characteristics</b> |                                      |                                  |         |
| Age, years                               | 77±6                                 | 73±7                             | 0.25    |
| male, n (%)                              | 17 (74%)                             | 32 (89%)                         | 0.18    |
| Smoking status                           |                                      |                                  |         |
| Smokers, n (%)                           | 12 (52%)                             | 26 (72%)                         | 0.11    |
| Pack-years                               | 22±27                                | 42.3±33.1                        | 0.13    |
| Pulmonary functions                      | n=13                                 | n=23                             |         |
| FVC (L)                                  | 1.56±0.72                            | 2.23±0.67                        | 0.02    |

|                                             |                   |                   |      |
|---------------------------------------------|-------------------|-------------------|------|
| FVC, %predicted                             | 56.4±27.3         | 70.6±17.1         | 0.12 |
| FEV <sub>1</sub> /FVC (%)                   | 89.5±9.5          | 86.3±7.6          | 0.24 |
| Thoracic computed tomography                |                   |                   |      |
| Emphysema, n (%)                            | 7 (30%)           | 20 (56%)          | 0.02 |
| CT pattern (2018 IPF guideline)             |                   |                   |      |
| Definite/Probable/Indeterminate/Alternative | 13/10/0/0         | 22/13/0/1         | 0.35 |
| Treatment, n (%)                            |                   |                   |      |
| Long-term oxygen therapy                    | 5 (21%)           | 7 (19%)           | 0.83 |
| Prednisolone                                | 6 (26%)           | 8 (22%)           | 0.73 |
| Antifibrotic agents                         | 2 (7%)            | 6 (16%)           | 0.22 |
| <b>Clinical data on admission</b>           |                   |                   |      |
| Respiratory rate (/min)                     | 26±5              | 23±6              | 0.18 |
| Laboratory data                             |                   |                   |      |
| Leukocytes (×10 <sup>3</sup> /μL)           | 11.2±3.5          | 11.0±5.1          | 0.34 |
| Lactate dehydrogenase (U/L)                 | 380±106           | 372±103           | 0.42 |
| KL-6 (U/mL)                                 | 1926±1642         | 1644±1193         | 0.63 |
| SP-D (U/mL)                                 | 352±147<br>(n=15) | 388±305<br>(n=22) | 0.23 |
| FIO <sub>2</sub>                            | 0.40±0.29         | 0.34±0.20         | 0.3  |
| P/F ratio                                   | 194±94            | 241±90            | 0.06 |
| Treatments, n (%)                           |                   |                   |      |
| Drugs                                       |                   |                   |      |
| Methylprednisolone pulse therapy            | 17 (74%)          | 22 (61%)          | 0.60 |
| Immunosuppressive therapy                   | 3 (13%)           | 4 (11%)           | 0.14 |
| Oxygen therapy                              |                   |                   |      |
| High flow nasal cannula                     | 7 (30%)           | 5 (14%)           | 0.11 |
| NPPV                                        | 2 (9%)            | 0 (0%)            | 0.16 |
| IPPV                                        | 1 (4%)            | 1 (3%)            | 1.00 |

FEV<sub>1</sub>, forced expiratory volume in one second; FVC, forced vital capacity; IPPV, intermittent positive pressure ventilation; KL-6, Krebs von Lungen-6; NIPPV, non-invasive intermittent positive pressure ventilation; P/F ratio, PaO<sub>2</sub>/FIO<sub>2</sub> ratio; SIRS, systemic inflammatory response syndrome; SP-D, surfactant protein D.

**Table 4. Cox proportional hazards regression analysis of mortality within 90 days**

|                                          | Hazard ratio | 95% confidence interval | P value |
|------------------------------------------|--------------|-------------------------|---------|
| Pulmonary emphysema                      | 0.33         | 0.14-0.82               | 0.01    |
| PaO <sub>2</sub> /FIO <sub>2</sub> ratio | 0.99         | 0.98-0.99               | 0.01    |

Adjusted for age and sex

196 In the multivariate analysis, FVC was not included because of the high rate of missing values.  
 197 Therefore, we performed a sub-analysis by dividing the patients into four subgroups  
 198 according to the presence or absence of emphysema and baseline FVC ( $\geq 60\%$  or  $< 60\%$  of  
 199 the predicted value). A Kaplan–Meier estimate according to this subgrouping revealed that  
 200 the presence of emphysema tended to have a good prognosis regardless of the %FVC  
 201 (Supplemental Figure 2). A Cox proportional hazards regression analysis including  
 202 the %FVC revealed that the presence of emphysema remained a predictor of mortality within  
 203 90 days (hazard ratio, 0.30 [95%CI 0.09–0.98],  $p = 0.04$ ). (Supplemental Table 1)

204

### 205 *Long-term prognosis*

206 Notably, 48 patients, including 21 patients in the IPF with emphysema group and 27 patients  
 207 in the IPF alone group, died during the observation period (median: 325 days, range: 2–1721  
 208 days). Although there was no difference in the total mortality between the groups, the median  
 209 survival time was significantly longer in the IPF with emphysema group than in the IPF alone  
 210 group (405 days vs. 254 days,  $p = 0.02$ , Table 5).

211

**Table 5. Prognosis after acute exacerbation of IPF**

|                                    | IPF with<br>emphysema | IPF alone      | P value |
|------------------------------------|-----------------------|----------------|---------|
| All patients                       | n = 29                | n = 33         |         |
| Median survival time, days         | 405 (2-1544)          | 254 (2-1721)   | 0.02    |
| Survivors at day 90                | n = 22                | n = 16         |         |
| Median survival time, days         | 573 (110-1544)        | 565 (106-1721) | 0.96    |
| Cause of death                     | n = 14                | n = 11         |         |
| Acute exacerbation, n (%)          | 4 (28%)               | 6 (55%)        | 0.24    |
| Chronic respiratory failure, n (%) | 3 (22%)               | 4 (36%)        | 0.66    |
| Pneumonia, n (%)                   | 3 (22%)               | 0 (0%)         | 0.23    |
| Unknown, n (%)                     | 4 (28%)               | 1 (9%)         | -       |

IPF, idiopathic pulmonary fibrosis

212 There were 38 patients who survived 90 days or more after admission due to AE-IPF,  
 213 including 22 patients with emphysema and 16 patients without emphysema (Table 5). In

214 these acute phase survivors, the long-term prognosis and cause of death was not  
215 significantly different between patients with and without emphysema ( $p = 0.8$ ) (Supplemental  
216 Figure 3, Table 5). The median survival times for the IPF with emphysema and IPF alone  
217 groups were 573 and 565 days, respectively ( $p = 0.96$ ). The leading cause of death in  
218 survivors was the exacerbation of IPF, regardless of the presence of emphysema (Table 5).

219

## 220 Discussion

221 We retrospectively analyzed 62 consecutive patients admitted for AE-IPF in two hospitals.  
222 Approximately half of the patients with AE-IPF exhibited pulmonary emphysema, who  
223 showed higher exposure to cigarette smoking, better FVC before AE, and higher levels of  
224 KL-6 and SP-D at AE. The patients with emphysema had better short-term survival than  
225 those without emphysema, although the long-term survival of the survivors was equivalent.  
226 Several possibilities may explain why the presence of emphysema was associated with  
227 better short-term prognosis in patients with IPF. First, the higher baseline FVC observed in  
228 the IPF with emphysema group may have contributed to a better survival rate. However,  
229 several studies have demonstrated that higher FVC values were not associated with better  
230 prognosis in patients with AE of chronic fibrosing interstitial pneumonia (CFIP).[14,15]  
231 Furthermore, the co-presence of emphysema may have masked the decrease in FVC in the  
232 IPF with emphysema group and greater FVC does not suggest a better capacity for alveolar  
233 gas exchange, which is essential for favorable oxygenation. In fact, there was no difference  
234 in the P/F ratio at exacerbation, an essential factor associated with the poor prognosis of AE-  
235 IPF, between patients with and without emphysema. Ikuyama et al. also reported that  
236 patients with CPFE had better baseline %FVC and better prognosis after exacerbation than  
237 those with IPF alone;[16] however, there was no difference in the %DLCO or GAP score  
238 between the groups. Therefore, the higher baseline FVC observed in the IPF with  
239 emphysema group is unlikely to be the cause of the better short-term prognosis in these  
240 patients. Although substantial FVC data were lacking in the present study, pulmonary

241 emphysema was an independent factor in determining the short-term prognosis even after  
242 adjustment for FVC values.

243 Ikuyama et al. reported that patients with CPFE exhibited significantly lower serum KL-6  
244 levels on admission and postulated that lung damage was less extensive in these patients.

245 [16] Another recent study also reported that higher serum KL-6 levels on admission were  
246 associated with a poorer prognosis in patients with AE-IPF.[17] However, in our study, the  
247 serum KL-6 levels were higher in patients with IPF and emphysema. Therefore, patients with  
248 IPF and emphysema had better short-term survival, regardless of their serum KL-6 levels on  
249 admission.

250 The heterogeneity of prognosis in patients with AE-IPF may be due to different pathological  
251 changes in the lungs during AE. Diffuse alveolar damage is the major pathological finding in  
252 the lungs with AE-IPF in autopsy cases, accounting for approximately 80% of cases, followed  
253 by alveolar hemorrhage.[18] In contrast, lung specimens obtained by surgical biopsy often  
254 show organizing pneumonia. Churg et al.[19] reported that 6 of 12 patients with AE-CFIP  
255 presented with organizing pneumonia and survived the acute phase, whereas half of the  
256 patients presenting with diffuse alveolar damage died. Currently, there is no histopathological  
257 information explaining the different prognoses of AE-IPF due to emphysema, and further  
258 studies are required.

259 The Kaplan–Meier estimate revealed significantly better short-term survival in the IPF with  
260 emphysema group than in the IPF alone group. However, in the survivors of acute phase,  
261 long-term prognosis was not significantly different between patients with and without  
262 emphysema. The major cause of death was AE-IPF, observed in 33 cases, comprising 11  
263 patients (52%) with emphysema and 22 patients (81%) without emphysema. This  
264 observation may be consistent with a previous report which stated that patients with IPF who  
265 never smoked and developed AE had poorer prognoses than those with IPF who  
266 smoked.[17]

1  
2  
3  
4  
5 267 This study has several limitations. First, this was a retrospective study of cases in two clinical  
6  
7 268 centers; therefore, the number of patients studied was limited. In addition, we could not  
8  
9 269 estimate the incidence of AEs in patients with IPF and pulmonary emphysema because of  
10  
11 270 the retrospective design of this study. Prospective multicenter studies, such as the Japan  
12  
13 271 Idiopathic Interstitial Pneumonias Registry are currently ongoing in Japan and are warranted.  
14  
15 272 Second, due to the real-world nature of the study, some clinical data, especially data on the  
16  
17 273 diffusion capacity and/or the six-minute walk test, which are used to calculate GAP scores to  
18  
19 274 evaluate the IPF severity,[20,21] were missing in most cases. However, we propose that the  
20  
21 275 presence or absence of emphysema on thoracic CT may be associated with the prognosis  
22  
23 276 of AE, which is a leading cause of death in patients with IPF.  
24

25  
26 277

## 27 278 **Conclusion**

29 279 Patients with AE-IPF and concomitant pulmonary emphysema had better short-term  
30  
31 280 prognoses than those without emphysema. Further studies are required to identify the  
32  
33 281 histopathological characteristics of AE-IPF lungs with emphysema associated with better  
34  
35 282 prognosis.  
36  
37  
38  
39  
40  
41  
42  
43  
44  
45  
46  
47  
48  
49  
50  
51  
52  
53  
54  
55  
56  
57  
58  
59  
60



1  
2  
3  
4  
5 284 **Abbreviations**  
6

7 285 AE, acute exacerbation; CFIP, chronic fibrosing interstitial pneumonia; CPFPE, combined  
8  
9 286 pulmonary fibrosis and emphysema; CT, computed tomography; FEV<sub>1</sub>, forced expiratory  
10  
11 287 volume in one second; FIO<sub>2</sub>, fraction of inhaled oxygen; FVC, forced vital capacity; IPF,  
12  
13 288 idiopathic pulmonary fibrosis; KL-6, Krebs von Lungen-6; PaO<sub>2</sub>, arterial partial oxygen  
14  
15 289 pressure; P/F ratio, PaO<sub>2</sub>/FIO<sub>2</sub> ratio; SpO<sub>2</sub>, oxygen saturation measured by pulse oximetry;  
16  
17 290 SP-D, surfactant protein D  
18  
19  
20  
21  
22  
23  
24  
25  
26  
27  
28  
29  
30  
31  
32  
33  
34  
35  
36  
37  
38  
39  
40  
41  
42  
43  
44  
45  
46  
47  
48  
49  
50  
51  
52  
53  
54  
55  
56  
57  
58  
59  
60

1  
2  
3  
4  
5 291 **Acknowledgements**

6  
7 292 None.

8  
9 293

10  
11 294 **Funding**

12  
13 295 This research received no specific grants from any funding agency in the public, commercial,  
14  
15 296 or not-for-profit sectors.

16  
17 297

18  
19 298 **Availability of data and material**

20  
21 299 The dataset used in this study is available from the corresponding author upon request.

22  
23 300

24  
25 301 **Authors' contributions**

26  
27 302 Yukihiro Horio contributed to the conception and design of the study, analyzed and  
28  
29 303 interpreted the data, and wrote the first version of the draft. Takahisa Takihara contributed to  
30  
31 304 the conception and design of the study, analyzed the data (radiological images), and wrote  
32  
33 305 the first version of the draft. Fuminari Takahashi contributed to the acquisition of data and  
34  
35 306 revised the manuscript critically for important intellectual content. Keito Enokida contributed  
36  
37 307 to the acquisition of data, analyzed the data (radiological images), and revised the manuscript  
38  
39 308 critically for important intellectual content. Noriko Nakamura analyzed the data (radiological  
40  
41 309 images) and revised the manuscript critically for important intellectual content. Jun Tanaka  
42  
43 310 contributed to the acquisition of data and revised the manuscript critically for important  
44  
45 311 intellectual content. Katsuyoshi Tomomatsu contributed to the acquisition of data and revised  
46  
47 312 the manuscript critically for important intellectual content. Kyoko Niimi contributed to the  
48  
49 313 acquisition of data and revised the manuscript critically for important intellectual content.  
50  
51 314 Sakurako Tajiri contributed to the acquisition of data and revised the manuscript critically for  
52  
53 315 important intellectual content. Naoki Hayama contributed to the acquisition of data and  
54  
55 316 revised the manuscript critically for important intellectual content. Yoko Ito contributed to the  
56  
57 317 acquisition of data and revised the manuscript critically for important intellectual content.  
58  
59  
60

318 Tsuyoshi Oguma contributed to the acquisition of data and revised the manuscript critically  
319 for important intellectual content. Koichiro Asano contributed to the conception and design of  
320 the study, analyzed and interpreted the data, and wrote the final version of the draft. All  
321 authors read and approved the final version of the draft, and agreed to be accountable for all  
322 aspects of the work in ensuring that questions related to the accuracy or integrity of any part  
323 of the work are appropriately investigated and resolved.

324

### 325 **Competing interests**

326 The authors declare no competing interests regarding of this study.

327

### 328 **Consent for publication**

329 Informed consent was obtained from the Tokai University Hospital website as an opt-out.

330 Patients who were rejected were excluded.

331

### 332 **Ethics approval**

333 This study was approved by the Institutional Review Board of Tokai University Hospital (17R-

334 198) and Tokai University Oiso Hospital (18R-241).

335

### 336 **References**

337 1 Natsuizaka M, Chiba H, Kuronuma K, et al. Epidemiologic survey of Japanese patients  
338 with idiopathic pulmonary fibrosis and investigation of ethnic differences. *Am J Respir*  
339 *Crit Care Med* 2014;190:773–9. doi: [10.1164/rccm.201403-0566OC](https://doi.org/10.1164/rccm.201403-0566OC).

340 2 Collard HR, Moore BB, Flaherty KR, et al. Acute exacerbations of idiopathic pulmonary  
341 fibrosis. *Am J Respir Crit Care Med* 2007;176:636–43. doi: [10.1164/rccm.200703-](https://doi.org/10.1164/rccm.200703-463PP)  
342 [463PP](https://doi.org/10.1164/rccm.200703-463PP).

343 3 Mejía M, Carrillo G, Rojas-Serrano J, et al. Idiopathic pulmonary fibrosis and  
344 emphysema: decreased survival associated with severe pulmonary arterial  
345 hypertension. *Chest* 2009;136:10–5. doi: [10.1378/chest.08-2306](https://doi.org/10.1378/chest.08-2306).

- 1  
2  
3  
4  
5 346 4 Cottin V, Nunes H, Brillet PY, et al. Combined pulmonary fibrosis and emphysema: a  
6 347 distinct underrecognised entity. *Eur Respir J* 2005;26:586–93. doi:  
7 348 [10.1183/09031936.05.00021005](https://doi.org/10.1183/09031936.05.00021005).
- 10 349 5 Usui K, Tanai C, Tanaka Y, et al. The prevalence of pulmonary fibrosis combined with  
11 350 emphysema in patients with lung cancer. *Respirology* 2011;16:326–31. doi:  
12 351 [10.1111/j.1440-1843.2010.01907.x](https://doi.org/10.1111/j.1440-1843.2010.01907.x).
- 15 352 6 Jiang CG, Fu Q, Zheng CM. Prognosis of combined pulmonary fibrosis and emphysema:  
16 353 comparison with idiopathic pulmonary fibrosis alone. *Ther Adv Respir Dis*  
17 354 2019;13:1753466619888119. doi: [10.1177/1753466619888119](https://doi.org/10.1177/1753466619888119).
- 20 355 7 Kishaba T, Shimaoka Y, Fukuyama H, et al. A cohort study of mortality predictors and  
21 356 characteristics of patients with combined pulmonary fibrosis and emphysema. *BMJ*  
22 357 *Open* 2012;2. doi: [10.1136/bmjopen-2012-000988](https://doi.org/10.1136/bmjopen-2012-000988).
- 25 358 8 Song JW, Hong SB, Lim CM, et al. Acute exacerbation of idiopathic pulmonary fibrosis:  
26 359 incidence, risk factors and outcome. *Eur Respir J* 2011;37:356–63. doi:  
27 360 [10.1183/09031936.00159709](https://doi.org/10.1183/09031936.00159709).
- 30 361 9 Kurashima K, Takayanagi N, Tsuchiya N, et al. The effect of emphysema on lung function  
31 362 and survival in patients with idiopathic pulmonary fibrosis. *Respirology* 2010;15:843–8.  
32 363 doi: [10.1111/j.1440-1843.2010.01778.x](https://doi.org/10.1111/j.1440-1843.2010.01778.x).
- 35 364 10 Kubota M, Kobayashi H, Quanjer PH, et al. Reference values for spirometry, including  
36 365 vital capacity, in Japanese adults calculated with the LMS method and compared with  
37 366 previous values. *Respir Investig* 2014;52:242–50. doi: [10.1016/j.resinv.2014.03.003](https://doi.org/10.1016/j.resinv.2014.03.003).
- 40 367 11 Hill A. The possible effects of the aggregation of the molecules of haemoglobin on its  
41 368 dissociation curves. *J Physiol* 1910;40:4–7.
- 44 369 12 Goddard PR, Nicholson EM, Laszlo G, et al. Computed tomography in pulmonary  
45 370 emphysema. *Clinical radiology* 1982;33(4):379-87 doi: [10.1016/s0009-9260\(82\)80301-](https://doi.org/10.1016/s0009-9260(82)80301-2)  
46 371 2.
- 49 372 13 Lynch DA, Sverzellati N, Travis WD, et al. Diagnostic criteria for idiopathic pulmonary  
50 373 fibrosis: a Fleischner Society White Paper. *The Lancet Respiratory medicine*  
51 374 2018;6(2):138-53 doi: [10.1016/S2213-2600\(17\)30433-2](https://doi.org/10.1016/S2213-2600(17)30433-2).
- 54 375 14 Akira M, Kozuka T, Yamamoto S, et al. Computed tomography findings in acute  
55 376 exacerbation of idiopathic pulmonary fibrosis. *Am J Respir Crit Care Med*  
56 377 2008;178:372–8. doi: [10.1164/rccm.200709-1365OC](https://doi.org/10.1164/rccm.200709-1365OC).

- 1  
2  
3  
4  
5 378 15 Oishi K, Aoe K, Mimura Y, et al. Survival from an acute exacerbation of idiopathic  
6 379 pulmonary fibrosis with or without direct hemoperfusion with a polymyxin B-immobilized  
7 380 fiber column: A retrospective analysis. *Intern Med* 2016;55:3551–59. doi:  
8 381 [10.2169/internalmedicine.55.6056](https://doi.org/10.2169/internalmedicine.55.6056).
- 11 382 16 Ikuyama Y, Ushiki A, Kosaka M, et al. Prognosis of patients with acute exacerbation of  
12 383 combined pulmonary fibrosis and emphysema: a retrospective single-centre study. *BMC*  
13 384 *Pulm Med* 2020;20:144. doi: [10.1186/s12890-020-01185-9](https://doi.org/10.1186/s12890-020-01185-9).
- 16 385 17 Kishaba T, Nagano H, Nei Y, et al. Clinical characteristics of idiopathic pulmonary fibrosis  
17 386 patients according to their smoking status. *J Thorac Dis* 2016;8:1112–20. doi:  
18 387 [10.21037/jtd.2016.03.89](https://doi.org/10.21037/jtd.2016.03.89).
- 21 388 18 Oda K, Ishimoto H, Yamada S, et al. Autopsy analyses in acute exacerbation of idiopathic  
22 389 pulmonary fibrosis. *Respir Res* 2014;15:109. doi: [10.1186/s12931-014-0109-y](https://doi.org/10.1186/s12931-014-0109-y).
- 24 390 19 Churg A, Müller NL, Silva CI, et al. Acute exacerbation (acute lung injury of unknown  
25 391 cause) in UIP and other forms of fibrotic interstitial pneumonias. *Am J Surg Pathol*  
26 392 2007;31:277–84. doi: [10.1097/01.pas.0000213341.70852.9d](https://doi.org/10.1097/01.pas.0000213341.70852.9d).
- 29 393 20 Kobayashi H, Omori S, Nakashima K, et al. Modified GAP index for prediction of acute  
30 394 exacerbation of idiopathic pulmonary fibrosis in non-small cell lung cancer. *Respirology*  
31 395 2017;22:1379–85. doi: [10.1111/resp.13075](https://doi.org/10.1111/resp.13075).
- 34 396 21 Ryerson CJ, Vittinghoff E, Ley B, et al. Predicting survival across chronic interstitial lung  
35 397 disease: the ILD-GAP model. *Chest* 2014;145:723–28. doi: [10.1378/chest.13-1474](https://doi.org/10.1378/chest.13-1474).  
36 398  
37  
38  
39  
40  
41  
42  
43  
44  
45  
46  
47  
48  
49  
50  
51  
52  
53  
54  
55  
56  
57  
58  
59  
60

1  
2  
3  
4  
5 **399 Figure legends**

6  
7  
8 400 Figure1.

9  
10 401 Kaplan–Meier survival curves for patients admitted to the hospital with AE-IPF with

11  
12 402 pulmonary emphysema (solid line, n = 29) and without emphysema (dashed line, n = 33).  
13  
14  
15  
16  
17  
18  
19  
20  
21  
22  
23  
24  
25  
26  
27  
28  
29  
30  
31  
32  
33  
34  
35  
36  
37  
38  
39  
40  
41  
42  
43  
44  
45  
46  
47  
48  
49  
50  
51  
52  
53  
54  
55  
56  
57  
58  
59  
60

For peer review only

1  
2  
3  
4  
5  
6  
7  
8  
9  
10  
11  
12  
13  
14  
15  
16  
17  
18  
19  
20  
21  
22  
23  
24  
25  
26  
27  
28  
29  
30  
31  
32  
33  
34  
35  
36  
37  
38  
39  
40  
41  
42  
43  
44  
45  
46  
47  
48  
49  
50  
51  
52  
53  
54  
55  
56  
57  
58  
59  
60

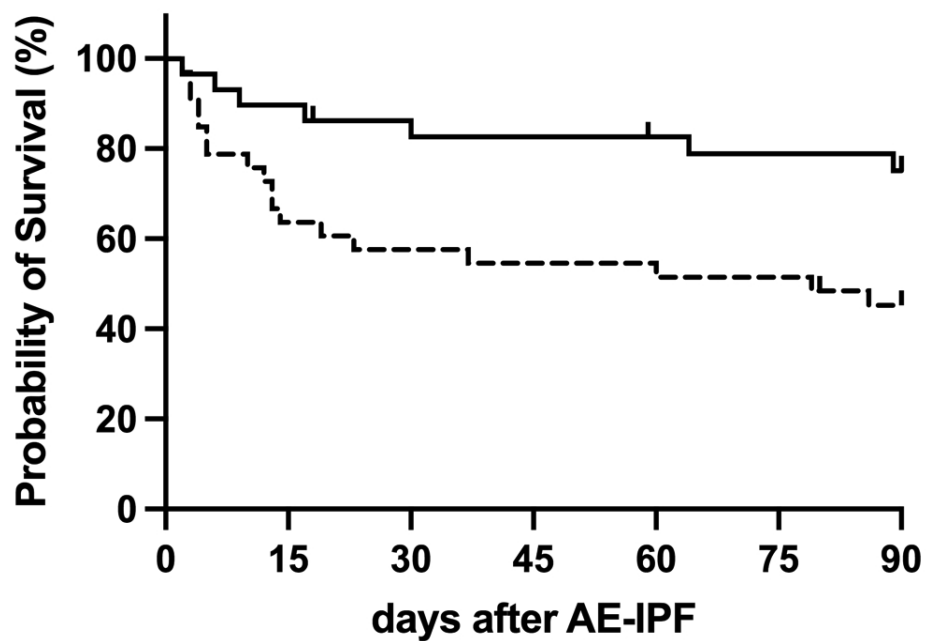

Figure 1

90x62mm (300 x 300 DPI)

## Supplemental material

### **Prognosis of acute exacerbation in idiopathic pulmonary fibrosis with pulmonary emphysema: a retrospective cohort study in Japan**

Yukihiro Horio<sup>1</sup>, Takahisa Takihara<sup>1</sup>, Fuminari Takahashi<sup>3</sup>, Keito Enokida<sup>1</sup>, Noriko  
Nakamura<sup>2</sup>, Jun Tanaka<sup>1</sup>, Katsuyoshi Tomomatsu<sup>1</sup>, Kyoko Niimi<sup>1</sup>, Sakurako Tajiri<sup>3</sup>, Naoki  
Hayama<sup>1</sup>, Yoko Ito<sup>1</sup> Tsuyoshi Oguma<sup>1</sup>, and Koichiro Asano<sup>1</sup>

<sup>1</sup>Division of Pulmonary Medicine, Department of Medicine, <sup>2</sup>Department of Radiology, Tokai  
University School of Medicine, Kanagawa, Japan, <sup>3</sup>Department of Medicine, Tokai  
University Oiso Hospital, Kanagawa, Japan



**Supplemental Table 1. Cox proportional hazards regression analysis of mortality within 90 days including data of forced vital capacity (FVC)**

|           | Hazard ratio | 95% confidence interval | P value |
|-----------|--------------|-------------------------|---------|
| Emphysema | 0.30         | 0.09-0.98               | 0.04    |

adjusting by age, sex, and %FVC>60%

FVC, forced vital capacity

## Supplemental Figure 1.

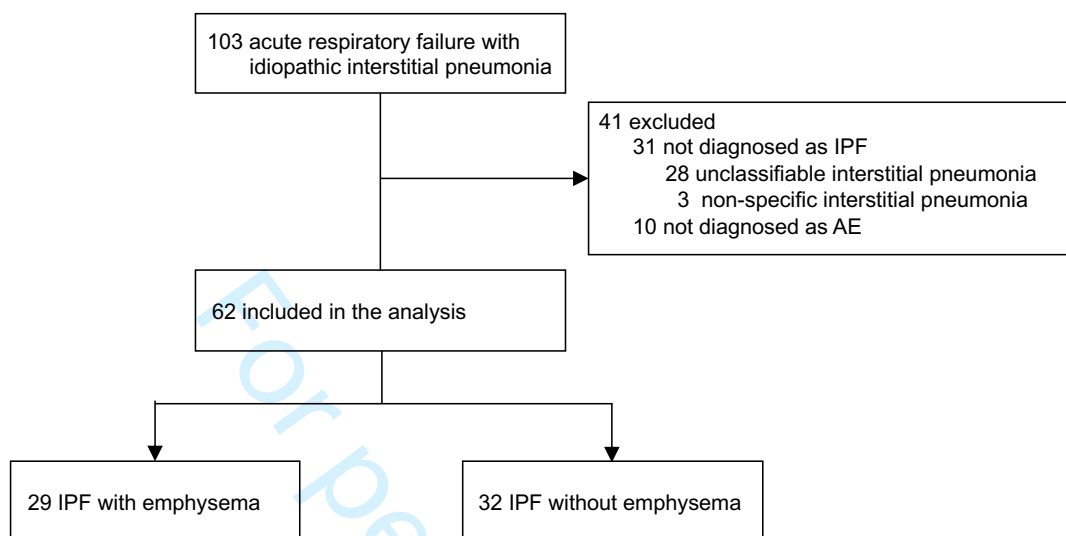

Flow diagram of patient selection. During the study period, 103 patients with idiopathic interstitial pneumonia admitted to hospitals due to acute respiratory failure. Thirty-one cases were not diagnosed as idiopathic pulmonary fibrosis (IPF) based on multidisciplinary discussion [unclassifiable interstitial lung disease (n = 28) and non-specific interstitial pneumonia (n = 3)] and excluded from the analysis. Another ten cases were excluded because the major cause of respiratory failure at admission was considered as infection or heart failure, but not an acute exacerbation (AE) of IPF, based on the clinical course after treatments. Patients with AE-IPF (n = 62) were divided into two groups according to the presence of concomitant pulmonary emphysema.

Supplemental Figure 2

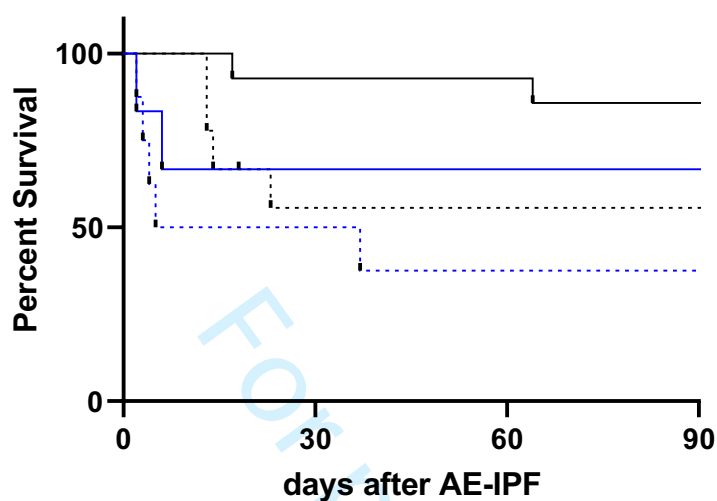

Kaplan-Meier survival curves for the patients admitted to the hospitals due to acute exacerbation of idiopathic pulmonary fibrosis. The patients were divided into four subgroups according to the presence or absence of pulmonary emphysema and baseline forced vital capacity (FVC;  $\geq 60\%$  or  $< 60\%$  of the predicted value); Group 1 (black solid line,  $n = 14$ , with emphysema and baseline FVC  $\geq 60\%$ ), group 2 (black dotted line,  $n = 9$ , without emphysema and baseline FVC  $\geq 60\%$ ), group 3 (blue solid line,  $n = 6$ , with emphysema and baseline FVC  $< 60\%$ ), and group 4 (blue dotted line,  $n = 8$ , without emphysema and baseline FVC  $< 60\%$ ).

## Supplemental Figure 3

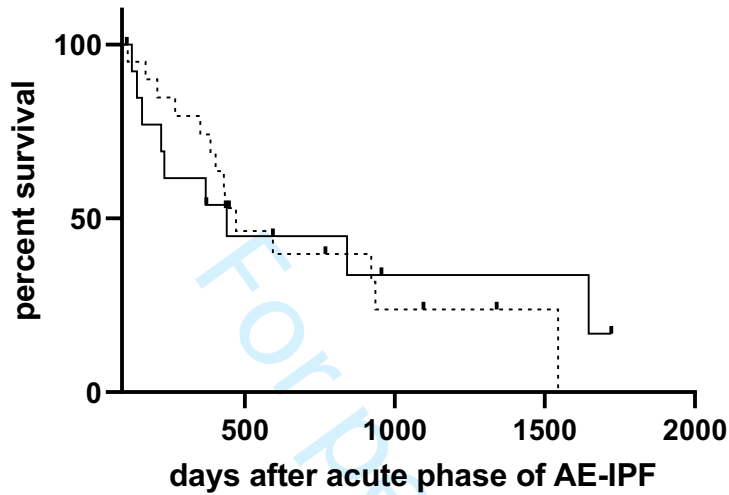

Kaplan-Meier survival curves for the survivor of acute phase (90 days) after acute exacerbation of idiopathic pulmonary fibrosis with pulmonary emphysema (solid line, n = 22) and without emphysema (dotted line, n = 16).

STROBE Statement—Checklist of items that should be included in reports of *cross-sectional studies*

|                              | Item No                                                                            | Recommendation                                                                                                                                                                                               | Page No |
|------------------------------|------------------------------------------------------------------------------------|--------------------------------------------------------------------------------------------------------------------------------------------------------------------------------------------------------------|---------|
| <b>Title and abstract</b>    | 1                                                                                  | (a) Indicate the study's design with a commonly used term in the title or the abstract                                                                                                                       | 1.2     |
|                              |                                                                                    | (b) Provide in the abstract an informative and balanced summary of what was done and what was found                                                                                                          | 1.2     |
| <b>Introduction</b>          |                                                                                    |                                                                                                                                                                                                              |         |
| Background/rationale         | 2                                                                                  | Explain the scientific background and rationale for the investigation being reported                                                                                                                         | 4       |
| Objectives                   | 3                                                                                  | State specific objectives, including any prespecified hypotheses                                                                                                                                             | 4       |
| <b>Methods</b>               |                                                                                    |                                                                                                                                                                                                              |         |
| Study design                 | 4                                                                                  | Present key elements of study design early in the paper                                                                                                                                                      | 5       |
| Setting                      | 5                                                                                  | Describe the setting, locations, and relevant dates, including periods of recruitment, exposure, follow-up, and data collection                                                                              | 5       |
| Participants                 | 6                                                                                  | (a) Give the eligibility criteria, and the sources and methods of selection of participants                                                                                                                  | 5-6     |
| Variables                    | 7                                                                                  | Clearly define all outcomes, exposures, predictors, potential confounders, and effect modifiers. Give diagnostic criteria, if applicable                                                                     | 5-6     |
| Data sources/<br>measurement | 8*                                                                                 | For each variable of interest, give sources of data and details of methods of assessment (measurement). Describe comparability of assessment methods if there is more than one group                         | 5-6     |
| Bias                         | 9                                                                                  | Describe any efforts to address potential sources of bias                                                                                                                                                    | 5       |
| Study size                   | 10                                                                                 | Explain how the study size was arrived at                                                                                                                                                                    | 5       |
| Quantitative variables       | 11                                                                                 | Explain how quantitative variables were handled in the analyses. If applicable, describe which groupings were chosen and why                                                                                 | N/A     |
| Statistical methods          | 12                                                                                 | (a) Describe all statistical methods, including those used to control for confounding                                                                                                                        | 6-7     |
|                              |                                                                                    | (b) Describe any methods used to examine subgroups and interactions                                                                                                                                          | 6-7     |
|                              | (c) Explain how missing data were addressed                                        |                                                                                                                                                                                                              |         |
|                              | (d) If applicable, describe analytical methods taking account of sampling strategy | N/A                                                                                                                                                                                                          |         |
|                              | (e) Describe any sensitivity analyses                                              | 6-7                                                                                                                                                                                                          |         |
| <b>Results</b>               |                                                                                    |                                                                                                                                                                                                              |         |
| Participants                 | 13*                                                                                | (a) Report numbers of individuals at each stage of study—eg numbers potentially eligible, examined for eligibility, confirmed eligible, included in the study, completing follow-up, and analysed            | 8       |
|                              |                                                                                    | (b) Give reasons for non-participation at each stage                                                                                                                                                         | N/A     |
|                              |                                                                                    | (c) Consider use of a flow diagram                                                                                                                                                                           |         |
| Descriptive data             | 14*                                                                                | (a) Give characteristics of study participants (eg demographic, clinical, social) and information on exposures and potential confounders                                                                     | 8-9     |
|                              |                                                                                    | (b) Indicate number of participants with missing data for each variable of interest                                                                                                                          | 8       |
| Outcome data                 | 15*                                                                                | Report numbers of outcome events or summary measures                                                                                                                                                         | 9-10    |
| Main results                 | 16                                                                                 | (a) Give unadjusted estimates and, if applicable, confounder-adjusted estimates and their precision (eg, 95% confidence interval). Make clear which confounders were adjusted for and why they were included | 9-10    |

|                          |    |                                                                                                                                                                            |       |
|--------------------------|----|----------------------------------------------------------------------------------------------------------------------------------------------------------------------------|-------|
|                          |    | (b) Report category boundaries when continuous variables were categorized                                                                                                  | N/A   |
|                          |    | (c) If relevant, consider translating estimates of relative risk into absolute risk for a meaningful time period                                                           | N/A   |
| Other analyses           | 17 | Report other analyses done—eg analyses of subgroups and interactions, and sensitivity analyses                                                                             | 9-10  |
| <b>Discussion</b>        |    |                                                                                                                                                                            |       |
| Key results              | 18 | Summarise key results with reference to study objectives                                                                                                                   | 11    |
| Limitations              | 19 | Discuss limitations of the study, taking into account sources of potential bias or imprecision. Discuss both direction and magnitude of any potential bias                 | 12-13 |
| Interpretation           | 20 | Give a cautious overall interpretation of results considering objectives, limitations, multiplicity of analyses, results from similar studies, and other relevant evidence | 11-12 |
| Generalisability         | 21 | Discuss the generalisability (external validity) of the study results                                                                                                      | 11-12 |
| <b>Other information</b> |    |                                                                                                                                                                            |       |
| Funding                  | 22 | Give the source of funding and the role of the funders for the present study and, if applicable, for the original study on which the present article is based              | 15    |

\*Give information separately for exposed and unexposed groups.

**Note:** An Explanation and Elaboration article discusses each checklist item and gives methodological background and published examples of transparent reporting. The STROBE checklist is best used in conjunction with this article (freely available on the Web sites of PLoS Medicine at <http://www.plosmedicine.org/>, Annals of Internal Medicine at <http://www.annals.org/>, and Epidemiology at <http://www.epidem.com/>). Information on the STROBE Initiative is available at [www.strobe-statement.org](http://www.strobe-statement.org).
